# Supplementary material
Source: publisher figshare collection journal article supplement (https://acs.figshare.com/ndownloader/files/5122597)
Supplement: Supplementary file 1 [file 5122597]

data_publication_text
_publ_requested_journal          'J. Am'
_publ_contact_author_name        'Prof. H. V. R. Dias'
_publ_contact_author_address     
;Department of Chemistry and Biochemistry
The University of Texas at Arlington
Arlington, Texas 76019-0065, USA
;
_publ_contact_author_email       dias@uta.edu
_publ_contact_author_phone       817-272-3813
_publ_contact_author_fax         817-272-3808
loop_
_publ_author_name
_publ_author_address
'Prof. H. V. R. Dias'
;Department of Chemistry and Biochemistry
The University of Texas at Arlington
Arlington, Texas 76019-0065, USA
;

  
data_dias49a 
  
_audit_creation_method            SHELXL-97 
_chemical_name_systematic 
; 
 ? 
; 
_chemical_name_common             [3-(CF3)PzCu]3 
_chemical_melting_point           ? 
_chemical_formula_moiety          ? 
_chemical_formula_sum 
 'C12 H6 Cu3 F9 N6' 
_chemical_formula_weight          595.85 
  
loop_ 
 _atom_type_symbol 
 _atom_type_description 
 _atom_type_scat_dispersion_real 
 _atom_type_scat_dispersion_imag 
 _atom_type_scat_source 
 'C'  'C'   0.0033   0.0016 
 'International Tables Vol C Tables 4.2.6.8 and 6.1.1.4' 
 'H'  'H'   0.0000   0.0000 
 'International Tables Vol C Tables 4.2.6.8 and 6.1.1.4' 
 'N'  'N'   0.0061   0.0033 
 'International Tables Vol C Tables 4.2.6.8 and 6.1.1.4' 
 'F'  'F'   0.0171   0.0103 
 'International Tables Vol C Tables 4.2.6.8 and 6.1.1.4' 
 'Cu'  'Cu'   0.3201   1.2651 
 'International Tables Vol C Tables 4.2.6.8 and 6.1.1.4' 
  
_symmetry_cell_setting            Monoclinic 
_symmetry_space_group_name_H-M    P2(1)/c 
  
loop_ 
 _symmetry_equiv_pos_as_xyz 
 'x, y, z' 
 '-x, y+1/2, -z+1/2' 
 '-x, -y, -z' 
 'x, -y-1/2, z-1/2' 
  
_cell_length_a                    15.0852(7) 
_cell_length_b                    18.0948(9) 
_cell_length_c                    13.1160(6) 
_cell_angle_alpha                 90.00 
_cell_angle_beta                  100.7710(10) 
_cell_angle_gamma                 90.00 
_cell_volume                      3517.1(3) 
_cell_formula_units_Z             8 
_cell_measurement_temperature     100(2) 
_cell_measurement_reflns_used     6519 
_cell_measurement_theta_min       2.20 
_cell_measurement_theta_max       27.86 
  
_exptl_crystal_description        needles 
_exptl_crystal_colour             colorless 
_exptl_crystal_size_max           0.45 
_exptl_crystal_size_mid           0.02 
_exptl_crystal_size_min           0.02 
_exptl_crystal_density_meas       0 
_exptl_crystal_density_diffrn     2.251 
_exptl_crystal_density_method     'not measured' 
_exptl_crystal_F_000              2304 
_exptl_absorpt_coefficient_mu     3.699 
_exptl_absorpt_correction_type    none 
_exptl_absorpt_correction_T_min   0.2868 
_exptl_absorpt_correction_T_max   0.9297 
_exptl_absorpt_process_details    SADABS 
  
_exptl_special_details 
; 
 ? 
; 
  
_diffrn_ambient_temperature       100(2) 
_diffrn_radiation_wavelength      0.71073 
_diffrn_radiation_type            MoK\a 
_diffrn_radiation_source          'fine-focus sealed tube' 
_diffrn_radiation_monochromator   graphite 
_diffrn_measurement_device_type   'CCD area detector' 
_diffrn_measurement_method        'phi and omega scans' 
_diffrn_detector_area_resol_mean  ? 
_diffrn_standards_number          ? 
_diffrn_standards_interval_count  ? 
_diffrn_standards_interval_time   ? 
_diffrn_standards_decay_%         ? 
_diffrn_reflns_number             23278 
_diffrn_reflns_av_R_equivalents   0.0955 
_diffrn_reflns_av_sigmaI/netI     0.0810 
_diffrn_reflns_limit_h_min        -17 
_diffrn_reflns_limit_h_max        17 
_diffrn_reflns_limit_k_min        -20 
_diffrn_reflns_limit_k_max        20 
_diffrn_reflns_limit_l_min        -15 
_diffrn_reflns_limit_l_max        15 
_diffrn_reflns_theta_min          1.78 
_diffrn_reflns_theta_max          24.00 
_reflns_number_total              5524 
_reflns_number_gt                 3752 
_reflns_threshold_expression      >2sigma(I) 
  
_computing_data_collection        'Bruker SMART' 
_computing_cell_refinement        'Bruker SMART' 
_computing_data_reduction         'Bruker SAINT' 
_computing_structure_solution     'SHELXS-97 (Sheldrick, 1990)' 
_computing_structure_refinement   'SHELXL-97 (Sheldrick, 1997)' 
_computing_molecular_graphics     'Bruker SHELXTL' 
_computing_publication_material   'Bruker SHELXTL' 
  
_refine_special_details 
; 
 Refinement of F^2^ against ALL reflections.  The weighted R-factor wR and 
 goodness of fit S are based on F^2^, conventional R-factors R are based 
 on F, with F set to zero for negative F^2^. The threshold expression of 
 F^2^ > 2sigma(F^2^) is used only for calculating R-factors(gt) etc. and is 
 not relevant to the choice of reflections for refinement.  R-factors based 
 on F^2^ are statistically about twice as large as those based on F, and R- 
 factors based on ALL data will be even larger. 
; 
  
_refine_ls_structure_factor_coef  Fsqd 
_refine_ls_matrix_type            full 
_refine_ls_weighting_scheme       calc 
_refine_ls_weighting_details 
 'calc w=1/[\s^2^(Fo^2^)+(0.1001P)^2^+0.0000P] where P=(Fo^2^+2Fc^2^)/3' 
_atom_sites_solution_primary      direct 
_atom_sites_solution_secondary    difmap 
_atom_sites_solution_hydrogens    geom 
_refine_ls_hydrogen_treatment     mixed 
_refine_ls_extinction_method      none 
_refine_ls_extinction_coef        ? 
_refine_ls_number_reflns          5524 
_refine_ls_number_parameters      541 
_refine_ls_number_restraints      0 
_refine_ls_R_factor_all           0.0949 
_refine_ls_R_factor_gt            0.0598 
_refine_ls_wR_factor_ref          0.1699 
_refine_ls_wR_factor_gt           0.1467 
_refine_ls_goodness_of_fit_ref    1.012 
_refine_ls_restrained_S_all       1.012 
_refine_ls_shift/su_max           0.000 
_refine_ls_shift/su_mean          0.000 
  
loop_ 
 _atom_site_label 
 _atom_site_type_symbol 
 _atom_site_fract_x 
 _atom_site_fract_y 
 _atom_site_fract_z 
 _atom_site_U_iso_or_equiv 
 _atom_site_adp_type 
 _atom_site_occupancy 
 _atom_site_symmetry_multiplicity 
 _atom_site_calc_flag 
 _atom_site_refinement_flags 
 _atom_site_disorder_assembly 
 _atom_site_disorder_group 
Cu1 Cu 0.31985(7) 0.55585(6) -0.06272(8) 0.0318(3) Uani 1 1 d . . . 
Cu2 Cu 0.45253(7) 0.41522(6) -0.03872(9) 0.0375(3) Uani 1 1 d . . . 
Cu3 Cu 0.39182(7) 0.48655(6) 0.16473(8) 0.0349(3) Uani 1 1 d . . . 
Cu4 Cu 0.12786(7) 0.48886(6) -0.08721(8) 0.0305(3) Uani 1 1 d . . . 
Cu5 Cu 0.19053(7) 0.40303(6) 0.12879(8) 0.0307(3) Uani 1 1 d . . . 
Cu6 Cu 0.08307(7) 0.55874(6) 0.12697(8) 0.0298(3) Uani 1 1 d . . . 
N1 N 0.3442(5) 0.5083(4) -0.1813(5) 0.0320(17) Uani 1 1 d . . . 
N2 N 0.4042(5) 0.4513(4) -0.1688(6) 0.0345(18) Uani 1 1 d . . . 
N3 N 0.4919(5) 0.3727(4) 0.0908(6) 0.0374(18) Uani 1 1 d . . . 
N4 N 0.4613(5) 0.4001(4) 0.1760(6) 0.0358(18) Uani 1 1 d . . . 
N5 N 0.3281(4) 0.5755(4) 0.1518(5) 0.0323(17) Uani 1 1 d . . . 
N6 N 0.2987(5) 0.6061(4) 0.0556(5) 0.0311(17) Uani 1 1 d . . . 
N7 N 0.1911(4) 0.3998(4) -0.0849(5) 0.0280(16) Uani 1 1 d . . . 
N8 N 0.2175(4) 0.3628(4) 0.0072(5) 0.0277(16) Uani 1 1 d . . . 
N9 N 0.1603(4) 0.4405(4) 0.2498(5) 0.0298(16) Uani 1 1 d . . . 
N10 N 0.1152(4) 0.5050(4) 0.2496(5) 0.0277(16) Uani 1 1 d . . . 
N11 N 0.0541(4) 0.6114(4) 0.0021(5) 0.0306(17) Uani 1 1 d . . . 
N12 N 0.0683(4) 0.5790(4) -0.0891(5) 0.0314(17) Uani 1 1 d . . . 
C1 C 0.4074(6) 0.4252(5) -0.2674(8) 0.041(2) Uani 1 1 d . . . 
H1 H 0.4434 0.3850 -0.2821 0.050 Uiso 1 1 calc R . . 
C2 C 0.3514(7) 0.4657(5) -0.3405(7) 0.043(2) Uani 1 1 d . . . 
H2 H 0.3410 0.4596 -0.4137 0.051 Uiso 1 1 calc R . . 
C3 C 0.3130(7) 0.5175(5) -0.2843(7) 0.039(2) Uani 1 1 d . . . 
C4 C 0.2421(7) 0.5718(5) -0.3217(7) 0.040(2) Uani 1 1 d . . . 
C5 C 0.4954(6) 0.3551(6) 0.2568(8) 0.043(2) Uani 1 1 d . . . 
C6 C 0.5474(6) 0.3005(5) 0.2257(8) 0.043(2) Uani 1 1 d . . . 
H6 H 0.5790 0.2624 0.2670 0.052 Uiso 1 1 calc R . . 
C7 C 0.5437(6) 0.3129(5) 0.1221(8) 0.043(2) Uani 1 1 d . . . 
H7 H 0.5733 0.2837 0.0785 0.052 Uiso 1 1 calc R . . 
C8 C 0.4719(7) 0.3697(6) 0.3600(8) 0.048(3) Uani 1 1 d . . . 
C9 C 0.2576(6) 0.6702(5) 0.0656(6) 0.034(2) Uani 1 1 d . . . 
H9 H 0.2314 0.7015 0.0099 0.041 Uiso 1 1 calc R . . 
C10 C 0.2590(6) 0.6845(5) 0.1719(7) 0.037(2) Uani 1 1 d . . . 
H10 H 0.2353 0.7260 0.2022 0.045 Uiso 1 1 calc R . . 
C11 C 0.3028(5) 0.6240(5) 0.2209(6) 0.032(2) Uani 1 1 d . . . 
C12 C 0.3328(6) 0.6126(6) 0.3361(8) 0.045(3) Uani 1 1 d . . . 
C13 C 0.2594(5) 0.3000(4) -0.0127(6) 0.0260(18) Uani 1 1 d . . . 
C14 C 0.2634(5) 0.2967(4) -0.1180(6) 0.0293(19) Uani 1 1 d . . . 
H14 H 0.2901 0.2592 -0.1531 0.035 Uiso 1 1 calc R . . 
C15 C 0.2197(5) 0.3599(5) -0.1599(6) 0.0285(19) Uani 1 1 d . . . 
H15 H 0.2111 0.3735 -0.2311 0.034 Uiso 1 1 calc R . . 
C16 C 0.2919(6) 0.2447(5) 0.0680(6) 0.031(2) Uani 1 1 d . . . 
C17 C 0.0963(6) 0.5129(5) 0.3464(6) 0.033(2) Uani 1 1 d . . . 
C18 C 0.1296(6) 0.4543(5) 0.4081(7) 0.036(2) Uani 1 1 d . . . 
H18 H 0.1264 0.4467 0.4790 0.043 Uiso 1 1 calc R . . 
C19 C 0.1685(6) 0.4090(5) 0.3451(7) 0.038(2) Uani 1 1 d . . . 
H19 H 0.1968 0.3629 0.3650 0.046 Uiso 1 1 calc R . . 
C20 C 0.0487(6) 0.5800(5) 0.3731(7) 0.036(2) Uani 1 1 d . . . 
C21 C 0.0422(6) 0.6285(5) -0.1663(7) 0.033(2) Uani 1 1 d . . . 
H21 H 0.0444 0.6204 -0.2373 0.039 Uiso 1 1 calc R . . 
C22 C 0.0117(6) 0.6927(5) -0.1269(7) 0.039(2) Uani 1 1 d . . . 
H22 H -0.0102 0.7362 -0.1638 0.047 Uiso 1 1 calc R . . 
C23 C 0.0204(5) 0.6793(5) -0.0212(7) 0.033(2) Uani 1 1 d . . . 
C24 C 0.0035(5) 0.7319(5) 0.0596(7) 0.033(2) Uani 1 1 d . . . 
F1 F 0.1587(4) 0.5425(3) -0.3342(4) 0.0552(15) Uani 1 1 d . . . 
F2 F 0.2419(4) 0.6296(3) -0.2575(4) 0.0477(14) Uani 1 1 d . . . 
F3 F 0.2496(4) 0.5992(4) -0.4146(4) 0.0709(19) Uani 1 1 d . . . 
F4 F 0.5035(5) 0.3134(4) 0.4259(5) 0.088(2) Uani 1 1 d . . . 
F5 F 0.5017(5) 0.4311(4) 0.4055(5) 0.083(2) Uani 1 1 d . . . 
F6 F 0.3818(4) 0.3704(4) 0.3571(5) 0.0610(16) Uani 1 1 d . . . 
F7 F 0.3139(5) 0.5452(4) 0.3648(4) 0.071(2) Uani 1 1 d . . . 
F8 F 0.4216(4) 0.6221(4) 0.3674(4) 0.0572(16) Uani 1 1 d . . . 
F9 F 0.2934(4) 0.6609(4) 0.3896(4) 0.073(2) Uani 1 1 d . . . 
F10 F 0.3679(4) 0.2119(4) 0.0554(5) 0.0618(17) Uani 1 1 d . . . 
F11 F 0.3129(4) 0.2750(3) 0.1640(4) 0.0582(16) Uani 1 1 d . . . 
F12 F 0.2340(4) 0.1913(3) 0.0742(5) 0.0640(18) Uani 1 1 d . . . 
F13 F 0.0927(4) 0.6423(3) 0.3603(5) 0.0580(16) Uani 1 1 d . . . 
F14 F 0.0380(4) 0.5788(3) 0.4717(4) 0.0552(16) Uani 1 1 d . . . 
F15 F -0.0340(3) 0.5880(3) 0.3152(4) 0.0509(15) Uani 1 1 d . . . 
F16 F -0.0172(4) 0.6976(3) 0.1423(4) 0.0564(16) Uani 1 1 d . . . 
F17 F -0.0612(3) 0.7796(3) 0.0243(4) 0.0502(15) Uani 1 1 d . . . 
F18 F 0.0778(3) 0.7741(3) 0.0960(4) 0.0438(13) Uani 1 1 d . . . 
  
loop_ 
 _atom_site_aniso_label 
 _atom_site_aniso_U_11 
 _atom_site_aniso_U_22 
 _atom_site_aniso_U_33 
 _atom_site_aniso_U_23 
 _atom_site_aniso_U_13 
 _atom_site_aniso_U_12 
Cu1 0.0436(6) 0.0343(6) 0.0206(6) -0.0019(5) 0.0140(5) -0.0039(5) 
Cu2 0.0413(6) 0.0373(7) 0.0364(7) -0.0048(5) 0.0136(5) -0.0026(5) 
Cu3 0.0420(6) 0.0371(7) 0.0273(6) 0.0036(5) 0.0108(5) 0.0029(5) 
Cu4 0.0444(6) 0.0279(6) 0.0220(6) -0.0003(5) 0.0135(5) -0.0009(5) 
Cu5 0.0459(6) 0.0313(6) 0.0188(6) -0.0013(4) 0.0159(5) 0.0002(5) 
Cu6 0.0406(6) 0.0283(6) 0.0231(6) 0.0002(5) 0.0130(4) -0.0003(5) 
N1 0.042(4) 0.031(4) 0.028(4) -0.005(3) 0.019(3) -0.004(3) 
N2 0.038(4) 0.038(5) 0.034(4) -0.004(4) 0.022(3) -0.010(4) 
N3 0.038(4) 0.029(4) 0.045(5) -0.005(4) 0.008(4) 0.003(3) 
N4 0.034(4) 0.034(4) 0.038(5) 0.004(4) 0.004(3) 0.003(3) 
N5 0.033(4) 0.047(5) 0.020(4) -0.005(3) 0.013(3) -0.001(3) 
N6 0.038(4) 0.037(4) 0.021(4) -0.005(3) 0.011(3) -0.002(3) 
N7 0.038(4) 0.027(4) 0.022(4) -0.003(3) 0.016(3) -0.001(3) 
N8 0.039(4) 0.031(4) 0.017(4) -0.002(3) 0.016(3) -0.006(3) 
N9 0.041(4) 0.033(4) 0.020(4) -0.005(3) 0.017(3) -0.001(3) 
N10 0.038(4) 0.033(4) 0.015(4) 0.000(3) 0.014(3) 0.000(3) 
N11 0.034(4) 0.034(4) 0.025(4) -0.004(3) 0.010(3) -0.002(3) 
N12 0.037(4) 0.033(4) 0.028(4) -0.001(3) 0.017(3) -0.002(3) 
C1 0.050(6) 0.039(6) 0.046(6) -0.014(5) 0.037(5) -0.011(5) 
C2 0.068(6) 0.040(6) 0.029(5) -0.004(5) 0.031(5) -0.006(5) 
C3 0.066(6) 0.036(5) 0.023(5) 0.002(4) 0.025(5) -0.015(5) 
C4 0.061(6) 0.039(6) 0.022(5) 0.006(4) 0.013(4) -0.009(5) 
C5 0.036(5) 0.052(6) 0.042(6) -0.004(5) 0.009(4) -0.006(5) 
C6 0.034(5) 0.037(6) 0.054(7) -0.001(5) -0.004(5) 0.001(4) 
C7 0.043(5) 0.037(6) 0.047(6) -0.006(5) 0.000(5) 0.004(5) 
C8 0.050(6) 0.054(7) 0.038(6) 0.009(5) 0.003(5) 0.003(5) 
C9 0.039(5) 0.044(6) 0.020(5) -0.001(4) 0.006(4) 0.002(4) 
C10 0.034(5) 0.042(6) 0.039(6) -0.012(5) 0.013(4) -0.007(4) 
C11 0.033(4) 0.046(6) 0.022(5) -0.005(4) 0.014(4) -0.002(4) 
C12 0.044(6) 0.051(7) 0.046(6) -0.003(5) 0.019(5) -0.005(5) 
C13 0.042(5) 0.019(4) 0.021(4) 0.003(4) 0.017(4) -0.002(4) 
C14 0.043(5) 0.021(4) 0.027(5) -0.003(4) 0.014(4) -0.001(4) 
C15 0.038(5) 0.031(5) 0.018(4) 0.003(4) 0.011(4) -0.007(4) 
C16 0.047(5) 0.032(5) 0.020(5) -0.011(4) 0.017(4) -0.002(4) 
C17 0.041(5) 0.038(5) 0.024(5) 0.003(4) 0.015(4) -0.001(4) 
C18 0.046(5) 0.039(5) 0.029(5) -0.002(4) 0.018(4) 0.007(4) 
C19 0.050(5) 0.032(5) 0.035(6) 0.007(4) 0.016(4) 0.008(4) 
C20 0.038(5) 0.045(6) 0.029(5) -0.001(4) 0.015(4) 0.004(5) 
C21 0.042(5) 0.030(5) 0.027(5) 0.004(4) 0.008(4) -0.005(4) 
C22 0.046(5) 0.036(6) 0.036(6) 0.001(4) 0.013(4) -0.004(4) 
C23 0.033(4) 0.031(5) 0.034(5) 0.003(4) 0.003(4) 0.001(4) 
C24 0.034(5) 0.030(5) 0.035(5) -0.001(4) 0.009(4) 0.007(4) 
F1 0.052(3) 0.066(4) 0.047(4) -0.011(3) 0.010(3) -0.008(3) 
F2 0.062(3) 0.038(3) 0.042(3) -0.001(3) 0.007(3) -0.008(3) 
F3 0.087(4) 0.099(5) 0.034(4) 0.026(3) 0.031(3) 0.011(4) 
F4 0.103(5) 0.102(6) 0.064(5) 0.039(4) 0.025(4) 0.035(5) 
F5 0.123(6) 0.090(5) 0.048(4) -0.020(4) 0.041(4) -0.055(5) 
F6 0.057(4) 0.076(4) 0.053(4) 0.005(3) 0.019(3) -0.002(3) 
F7 0.110(5) 0.066(4) 0.033(3) 0.005(3) 0.008(3) -0.041(4) 
F8 0.049(3) 0.098(5) 0.025(3) -0.001(3) 0.007(2) -0.014(3) 
F9 0.088(4) 0.102(5) 0.036(3) -0.007(4) 0.032(3) 0.031(4) 
F10 0.062(4) 0.073(4) 0.057(4) 0.026(3) 0.027(3) 0.023(3) 
F11 0.101(5) 0.050(4) 0.025(3) 0.002(3) 0.012(3) 0.005(3) 
F12 0.057(3) 0.051(4) 0.074(4) 0.035(3) -0.013(3) -0.015(3) 
F13 0.074(4) 0.033(3) 0.077(4) -0.007(3) 0.042(3) 0.000(3) 
F14 0.077(4) 0.063(4) 0.031(3) -0.002(3) 0.025(3) 0.026(3) 
F15 0.048(3) 0.057(4) 0.048(3) -0.011(3) 0.008(3) 0.013(3) 
F16 0.092(4) 0.039(3) 0.048(4) -0.004(3) 0.039(3) -0.006(3) 
F17 0.042(3) 0.045(3) 0.063(4) -0.012(3) 0.006(3) 0.012(3) 
F18 0.046(3) 0.035(3) 0.051(3) -0.012(3) 0.010(3) -0.004(2) 
  
_geom_special_details 
; 
 All esds (except the esd in the dihedral angle between two l.s. planes) 
 are estimated using the full covariance matrix.  The cell esds are taken 
 into account individually in the estimation of esds in distances, angles 
 and torsion angles; correlations between esds in cell parameters are only 
 used when they are defined by crystal symmetry.  An approximate (isotropic) 
 treatment of cell esds is used for estimating esds involving l.s. planes. 
; 
  
loop_ 
 _geom_bond_atom_site_label_1 
 _geom_bond_atom_site_label_2 
 _geom_bond_distance 
 _geom_bond_site_symmetry_2 
 _geom_bond_publ_flag 
Cu1 N1 1.873(7) . ? 
Cu1 N6 1.876(7) . ? 
Cu2 N2 1.845(8) . ? 
Cu2 N3 1.858(8) . ? 
Cu3 N5 1.866(7) . ? 
Cu3 N4 1.873(7) . ? 
Cu4 N12 1.861(7) . ? 
Cu4 N7 1.870(7) . ? 
Cu5 N9 1.859(6) . ? 
Cu5 N8 1.866(6) . ? 
Cu6 N10 1.865(7) . ? 
Cu6 N11 1.875(7) . ? 
N1 C3 1.355(11) . ? 
N1 N2 1.362(10) . ? 
N2 C1 1.386(11) . ? 
N3 C7 1.353(11) . ? 
N3 N4 1.379(10) . ? 
N4 C5 1.359(12) . ? 
N5 C11 1.366(11) . ? 
N5 N6 1.374(9) . ? 
N6 C9 1.333(11) . ? 
N7 C15 1.355(10) . ? 
N7 N8 1.374(9) . ? 
N8 C13 1.348(10) . ? 
N9 N10 1.351(9) . ? 
N9 C19 1.358(11) . ? 
N10 C17 1.360(10) . ? 
N11 C23 1.343(11) . ? 
N11 N12 1.384(9) . ? 
N12 C21 1.354(11) . ? 
C1 C2 1.365(14) . ? 
C1 H1 0.9500 . ? 
C2 C3 1.385(13) . ? 
C2 H2 0.9500 . ? 
C3 C4 1.468(14) . ? 
C4 F3 1.339(10) . ? 
C4 F2 1.342(11) . ? 
C4 F1 1.348(10) . ? 
C5 C6 1.370(13) . ? 
C5 C8 1.486(14) . ? 
C6 C7 1.367(14) . ? 
C6 H6 0.9500 . ? 
C7 H7 0.9500 . ? 
C8 F5 1.301(12) . ? 
C8 F6 1.352(11) . ? 
C8 F4 1.364(11) . ? 
C9 C10 1.415(12) . ? 
C9 H9 0.9500 . ? 
C10 C11 1.374(13) . ? 
C10 H10 0.9500 . ? 
C11 C12 1.508(13) . ? 
C12 F7 1.323(11) . ? 
C12 F9 1.329(11) . ? 
C12 F8 1.337(10) . ? 
C13 C14 1.395(11) . ? 
C13 C16 1.473(12) . ? 
C14 C15 1.382(12) . ? 
C14 H14 0.9500 . ? 
C15 H15 0.9500 . ? 
C16 F12 1.316(10) . ? 
C16 F10 1.328(9) . ? 
C16 F11 1.356(9) . ? 
C17 C18 1.371(12) . ? 
C17 C20 1.484(12) . ? 
C18 C19 1.372(12) . ? 
C18 H18 0.9500 . ? 
C19 H19 0.9500 . ? 
C20 F14 1.333(10) . ? 
C20 F13 1.335(10) . ? 
C20 F15 1.342(10) . ? 
C21 C22 1.385(12) . ? 
C21 H21 0.9500 . ? 
C22 C23 1.388(13) . ? 
C22 H22 0.9500 . ? 
C23 C24 1.482(12) . ? 
C24 F17 1.320(9) . ? 
C24 F16 1.336(10) . ? 
C24 F18 1.366(10) . ? 
  
loop_ 
 _geom_angle_atom_site_label_1 
 _geom_angle_atom_site_label_2 
 _geom_angle_atom_site_label_3 
 _geom_angle 
 _geom_angle_site_symmetry_1 
 _geom_angle_site_symmetry_3 
 _geom_angle_publ_flag 
N1 Cu1 N6 177.9(3) . . ? 
N2 Cu2 N3 174.5(3) . . ? 
N5 Cu3 N4 176.8(3) . . ? 
N12 Cu4 N7 178.2(3) . . ? 
N9 Cu5 N8 177.8(3) . . ? 
N10 Cu6 N11 178.1(3) . . ? 
C3 N1 N2 108.2(7) . . ? 
C3 N1 Cu1 133.3(6) . . ? 
N2 N1 Cu1 118.5(6) . . ? 
N1 N2 C1 106.5(8) . . ? 
N1 N2 Cu2 121.2(5) . . ? 
C1 N2 Cu2 131.8(7) . . ? 
C7 N3 N4 107.6(8) . . ? 
C7 N3 Cu2 132.6(7) . . ? 
N4 N3 Cu2 119.6(5) . . ? 
C5 N4 N3 106.3(7) . . ? 
C5 N4 Cu3 133.3(7) . . ? 
N3 N4 Cu3 120.3(6) . . ? 
C11 N5 N6 105.6(7) . . ? 
C11 N5 Cu3 134.1(6) . . ? 
N6 N5 Cu3 120.2(5) . . ? 
C9 N6 N5 109.6(6) . . ? 
C9 N6 Cu1 131.1(6) . . ? 
N5 N6 Cu1 119.2(5) . . ? 
C15 N7 N8 107.4(6) . . ? 
C15 N7 Cu4 132.7(6) . . ? 
N8 N7 Cu4 119.9(5) . . ? 
C13 N8 N7 108.0(6) . . ? 
C13 N8 Cu5 132.8(6) . . ? 
N7 N8 Cu5 119.2(5) . . ? 
N10 N9 C19 108.9(6) . . ? 
N10 N9 Cu5 121.1(5) . . ? 
C19 N9 Cu5 129.6(6) . . ? 
N9 N10 C17 106.4(7) . . ? 
N9 N10 Cu6 120.1(5) . . ? 
C17 N10 Cu6 133.2(6) . . ? 
C23 N11 N12 107.7(7) . . ? 
C23 N11 Cu6 132.9(6) . . ? 
N12 N11 Cu6 119.4(5) . . ? 
C21 N12 N11 107.2(7) . . ? 
C21 N12 Cu4 131.5(6) . . ? 
N11 N12 Cu4 120.8(5) . . ? 
C2 C1 N2 110.4(8) . . ? 
C2 C1 H1 124.8 . . ? 
N2 C1 H1 124.8 . . ? 
C1 C2 C3 104.8(8) . . ? 
C1 C2 H2 127.6 . . ? 
C3 C2 H2 127.6 . . ? 
N1 C3 C2 110.2(9) . . ? 
N1 C3 C4 120.8(8) . . ? 
C2 C3 C4 128.8(9) . . ? 
F3 C4 F2 107.1(8) . . ? 
F3 C4 F1 105.7(8) . . ? 
F2 C4 F1 105.7(7) . . ? 
F3 C4 C3 111.8(8) . . ? 
F2 C4 C3 113.5(8) . . ? 
F1 C4 C3 112.5(8) . . ? 
N4 C5 C6 110.8(9) . . ? 
N4 C5 C8 119.0(9) . . ? 
C6 C5 C8 130.3(10) . . ? 
C7 C6 C5 105.0(9) . . ? 
C7 C6 H6 127.5 . . ? 
C5 C6 H6 127.5 . . ? 
N3 C7 C6 110.3(9) . . ? 
N3 C7 H7 124.8 . . ? 
C6 C7 H7 124.8 . . ? 
F5 C8 F6 105.3(9) . . ? 
F5 C8 F4 107.3(9) . . ? 
F6 C8 F4 104.7(8) . . ? 
F5 C8 C5 116.7(9) . . ? 
F6 C8 C5 112.7(8) . . ? 
F4 C8 C5 109.3(9) . . ? 
N6 C9 C10 109.6(8) . . ? 
N6 C9 H9 125.2 . . ? 
C10 C9 H9 125.2 . . ? 
C11 C10 C9 103.4(8) . . ? 
C11 C10 H10 128.3 . . ? 
C9 C10 H10 128.3 . . ? 
N5 C11 C10 111.8(8) . . ? 
N5 C11 C12 120.5(8) . . ? 
C10 C11 C12 127.3(8) . . ? 
F7 C12 F9 108.3(8) . . ? 
F7 C12 F8 106.8(8) . . ? 
F9 C12 F8 105.9(8) . . ? 
F7 C12 C11 111.8(8) . . ? 
F9 C12 C11 111.0(8) . . ? 
F8 C12 C11 112.7(7) . . ? 
N8 C13 C14 109.7(7) . . ? 
N8 C13 C16 122.6(7) . . ? 
C14 C13 C16 127.7(7) . . ? 
C15 C14 C13 104.6(7) . . ? 
C15 C14 H14 127.7 . . ? 
C13 C14 H14 127.7 . . ? 
N7 C15 C14 110.2(7) . . ? 
N7 C15 H15 124.9 . . ? 
C14 C15 H15 124.9 . . ? 
F12 C16 F10 106.2(7) . . ? 
F12 C16 F11 106.4(7) . . ? 
F10 C16 F11 103.8(7) . . ? 
F12 C16 C13 114.0(7) . . ? 
F10 C16 C13 113.2(7) . . ? 
F11 C16 C13 112.4(7) . . ? 
N10 C17 C18 110.6(8) . . ? 
N10 C17 C20 120.1(8) . . ? 
C18 C17 C20 129.2(8) . . ? 
C17 C18 C19 104.9(8) . . ? 
C17 C18 H18 127.5 . . ? 
C19 C18 H18 127.5 . . ? 
N9 C19 C18 109.1(8) . . ? 
N9 C19 H19 125.4 . . ? 
C18 C19 H19 125.4 . . ? 
F14 C20 F13 106.8(8) . . ? 
F14 C20 F15 106.3(7) . . ? 
F13 C20 F15 105.6(7) . . ? 
F14 C20 C17 111.6(8) . . ? 
F13 C20 C17 112.8(7) . . ? 
F15 C20 C17 113.2(8) . . ? 
N12 C21 C22 110.3(8) . . ? 
N12 C21 H21 124.9 . . ? 
C22 C21 H21 124.9 . . ? 
C21 C22 C23 104.5(8) . . ? 
C21 C22 H22 127.8 . . ? 
C23 C22 H22 127.8 . . ? 
N11 C23 C22 110.4(8) . . ? 
N11 C23 C24 122.2(8) . . ? 
C22 C23 C24 127.2(8) . . ? 
F17 C24 F16 108.6(7) . . ? 
F17 C24 F18 105.2(7) . . ? 
F16 C24 F18 106.0(7) . . ? 
F17 C24 C23 112.6(7) . . ? 
F16 C24 C23 112.3(7) . . ? 
F18 C24 C23 111.6(7) . . ? 
  
_diffrn_measured_fraction_theta_max    1.000 
_diffrn_reflns_theta_full              24.00 
_diffrn_measured_fraction_theta_full   1.000 
_refine_diff_density_max    1.636 
_refine_diff_density_min   -1.121 
_refine_diff_density_rms    0.183 

#===END

  
data_dias157s 
  
_audit_creation_method            SHELXL-97 
_chemical_name_systematic 
; 
 ? 
; 
_chemical_name_common             [3-(CF3),5-(CH3)PzCu]3 
_chemical_melting_point           ? 
_chemical_formula_moiety          ? 
_chemical_formula_sum 
 'C15 H12 Cu3 F9 N6' 
_chemical_formula_weight          637.93 
  
loop_ 
 _atom_type_symbol 
 _atom_type_description 
 _atom_type_scat_dispersion_real 
 _atom_type_scat_dispersion_imag 
 _atom_type_scat_source 
 'C'  'C'   0.0033   0.0016 
 'International Tables Vol C Tables 4.2.6.8 and 6.1.1.4' 
 'H'  'H'   0.0000   0.0000 
 'International Tables Vol C Tables 4.2.6.8 and 6.1.1.4' 
 'N'  'N'   0.0061   0.0033 
 'International Tables Vol C Tables 4.2.6.8 and 6.1.1.4' 
 'F'  'F'   0.0171   0.0103 
 'International Tables Vol C Tables 4.2.6.8 and 6.1.1.4' 
 'Cu'  'Cu'   0.3201   1.2651 
 'International Tables Vol C Tables 4.2.6.8 and 6.1.1.4' 
  
_symmetry_cell_setting            Monoclinic 
_symmetry_space_group_name_H-M    Cc 
  
loop_ 
 _symmetry_equiv_pos_as_xyz 
 'x, y, z' 
 'x, -y, z+1/2' 
 'x+1/2, y+1/2, z' 
 'x+1/2, -y+1/2, z+1/2' 
  
_cell_length_a                    12.7722(5) 
_cell_length_b                    22.3549(9) 
_cell_length_c                    7.4500(3) 
_cell_angle_alpha                 90.00 
_cell_angle_beta                  107.7660(10) 
_cell_angle_gamma                 90.00 
_cell_volume                      2025.69(14) 
_cell_formula_units_Z             4 
_cell_measurement_temperature     100(2) 
_cell_measurement_reflns_used     8326 
_cell_measurement_theta_min       2.87 
_cell_measurement_theta_max       28.28 
  
_exptl_crystal_description        parallelpipe 
_exptl_crystal_colour             colorless 
_exptl_crystal_size_max           0.23 
_exptl_crystal_size_mid           0.15 
_exptl_crystal_size_min           0.10 
_exptl_crystal_density_meas       0 
_exptl_crystal_density_diffrn     2.092 
_exptl_crystal_density_method     'not measured' 
_exptl_crystal_F_000              1248 
_exptl_absorpt_coefficient_mu     3.219 
_exptl_absorpt_correction_type    none 
_exptl_absorpt_correction_T_min   0.5247 
_exptl_absorpt_correction_T_max   0.7390 
_exptl_absorpt_process_details    SADABS 
  
_exptl_special_details 
; 
 ? 
; 
  
_diffrn_ambient_temperature       100(2) 
_diffrn_radiation_wavelength      0.71073 
_diffrn_radiation_type            MoK\a 
_diffrn_radiation_source          'fine-focus sealed tube' 
_diffrn_radiation_monochromator   graphite 
_diffrn_measurement_device_type   'CCD area detector' 
_diffrn_measurement_method        'phi and omega scans' 
_diffrn_detector_area_resol_mean  ? 
_diffrn_standards_number          ? 
_diffrn_standards_interval_count  ? 
_diffrn_standards_interval_time   ? 
_diffrn_standards_decay_%         ? 
_diffrn_reflns_number             8079 
_diffrn_reflns_av_R_equivalents   0.0221 
_diffrn_reflns_av_sigmaI/netI     0.0379 
_diffrn_reflns_limit_h_min        -15 
_diffrn_reflns_limit_h_max        15 
_diffrn_reflns_limit_k_min        -27 
_diffrn_reflns_limit_k_max        27 
_diffrn_reflns_limit_l_min        -9 
_diffrn_reflns_limit_l_max        9 
_diffrn_reflns_theta_min          1.82 
_diffrn_reflns_theta_max          25.99 
_reflns_number_total              3831 
_reflns_number_gt                 3743 
_reflns_threshold_expression      >2sigma(I) 
  
_computing_data_collection        'Bruker SMART' 
_computing_cell_refinement        'Bruker SMART' 
_computing_data_reduction         'Bruker SAINT' 
_computing_structure_solution     'SHELXS-97 (Sheldrick, 1990)' 
_computing_structure_refinement   'SHELXL-97 (Sheldrick, 1997)' 
_computing_molecular_graphics     'Bruker SHELXTL' 
_computing_publication_material   'Bruker SHELXTL' 
  
_refine_special_details 
; 
 Refinement of F^2^ against ALL reflections.  The weighted R-factor wR and 
 goodness of fit S are based on F^2^, conventional R-factors R are based 
 on F, with F set to zero for negative F^2^. The threshold expression of 
 F^2^ > 2sigma(F^2^) is used only for calculating R-factors(gt) etc. and is 
 not relevant to the choice of reflections for refinement.  R-factors based 
 on F^2^ are statistically about twice as large as those based on F, and R- 
 factors based on ALL data will be even larger. 
; 
  
_refine_ls_structure_factor_coef  Fsqd 
_refine_ls_matrix_type            full 
_refine_ls_weighting_scheme       calc 
_refine_ls_weighting_details 
 'calc w=1/[\s^2^(Fo^2^)+(0.0298P)^2^+0.0000P] where P=(Fo^2^+2Fc^2^)/3' 
_atom_sites_solution_primary      direct 
_atom_sites_solution_secondary    difmap 
_atom_sites_solution_hydrogens    geom 
_refine_ls_hydrogen_treatment     mixed 
_refine_ls_extinction_method      none 
_refine_ls_extinction_coef        ? 
_refine_ls_abs_structure_details 
 'Flack H D (1983), Acta Cryst. A39, 876-881' 
_refine_ls_abs_structure_Flack    0.013(10) 
_refine_ls_number_reflns          3831 
_refine_ls_number_parameters      301 
_refine_ls_number_restraints      2 
_refine_ls_R_factor_all           0.0226 
_refine_ls_R_factor_gt            0.0220 
_refine_ls_wR_factor_ref          0.0585 
_refine_ls_wR_factor_gt           0.0583 
_refine_ls_goodness_of_fit_ref    1.059 
_refine_ls_restrained_S_all       1.059 
_refine_ls_shift/su_max           0.001 
_refine_ls_shift/su_mean          0.000 
  
loop_ 
 _atom_site_label 
 _atom_site_type_symbol 
 _atom_site_fract_x 
 _atom_site_fract_y 
 _atom_site_fract_z 
 _atom_site_U_iso_or_equiv 
 _atom_site_adp_type 
 _atom_site_occupancy 
 _atom_site_symmetry_multiplicity 
 _atom_site_calc_flag 
 _atom_site_refinement_flags 
 _atom_site_disorder_assembly 
 _atom_site_disorder_group 
Cu1 Cu 0.35882(3) 0.552591(16) 0.89359(5) 0.02151(9) Uani 1 1 d . . . 
Cu2 Cu 0.14048(2) 0.616058(15) 0.92686(4) 0.02013(9) Uani 1 1 d . . . 
Cu3 Cu 0.15315(3) 0.473051(16) 0.92750(5) 0.02359(10) Uani 1 1 d . . . 
N1 N 0.3506(2) 0.63546(11) 0.8939(4) 0.0203(5) Uani 1 1 d . . . 
N2 N 0.2559(2) 0.66273(11) 0.9050(3) 0.0186(5) Uani 1 1 d . . . 
N3 N 0.0219(2) 0.57148(12) 0.9450(4) 0.0226(5) Uani 1 1 d . . . 
N4 N 0.0254(2) 0.50975(12) 0.9431(3) 0.0217(5) Uani 1 1 d . . . 
N5 N 0.2793(2) 0.43612(12) 0.9074(4) 0.0235(5) Uani 1 1 d . . . 
N6 N 0.3683(2) 0.46939(12) 0.8993(4) 0.0231(5) Uani 1 1 d . . . 
F1 F 0.21120(17) 0.82062(9) 0.8774(4) 0.0470(6) Uani 1 1 d . . . 
F2 F 0.15830(18) 0.76417(11) 1.0647(3) 0.0502(6) Uani 1 1 d . . . 
F3 F 0.08984(17) 0.75269(10) 0.7675(3) 0.0475(6) Uani 1 1 d . . . 
F4 F -0.04085(19) 0.68156(10) 1.0874(3) 0.0495(6) Uani 1 1 d . . . 
F5 F -0.1107(2) 0.67915(10) 0.7904(3) 0.0514(6) Uani 1 1 d . . . 
F6 F -0.20887(18) 0.65704(12) 0.9699(4) 0.0639(7) Uani 1 1 d . . . 
F7 F 0.56104(18) 0.51109(10) 0.8622(4) 0.0535(6) Uani 1 1 d . . . 
F9 F 0.58536(17) 0.42825(11) 0.7397(3) 0.0451(5) Uani 1 1 d . . . 
F8 F 0.63669(18) 0.43741(12) 1.0385(3) 0.0521(6) Uani 1 1 d . . . 
C1 C 0.2726(2) 0.72158(14) 0.9038(4) 0.0204(6) Uani 1 1 d . . . 
C2 C 0.3764(3) 0.73407(14) 0.8933(4) 0.0243(7) Uani 1 1 d . . . 
H2 H 0.4087 0.7722 0.8907 0.029 Uiso 1 1 calc R . . 
C3 C 0.4230(3) 0.67823(15) 0.8875(4) 0.0246(7) Uani 1 1 d . . . 
C4 C 0.1833(3) 0.76395(15) 0.9044(5) 0.0268(7) Uani 1 1 d . . . 
C5 C 0.5353(3) 0.66348(16) 0.8764(5) 0.0284(7) Uani 1 1 d . . . 
H5A H 0.5838 0.6535 1.0025 0.043 Uiso 1 1 calc R . . 
H5B H 0.5650 0.6981 0.8273 0.043 Uiso 1 1 calc R . . 
H5C H 0.5305 0.6292 0.7922 0.043 Uiso 1 1 calc R . . 
C6 C -0.0716(3) 0.48844(16) 0.9441(4) 0.0258(7) Uani 1 1 d . . . 
C7 C -0.1419(3) 0.53629(15) 0.9453(5) 0.0285(8) Uani 1 1 d . . . 
H7 H -0.2161 0.5344 0.9459 0.034 Uiso 1 1 calc R . . 
C8 C -0.0800(3) 0.58657(15) 0.9456(4) 0.0244(7) Uani 1 1 d . . . 
C9 C -0.0945(3) 0.42213(17) 0.9404(5) 0.0359(8) Uani 1 1 d . . . 
H9A H -0.1435 0.4109 0.8159 0.054 Uiso 1 1 calc R . . 
H9B H -0.1295 0.4124 1.0368 0.054 Uiso 1 1 calc R . . 
H9C H -0.0252 0.4000 0.9659 0.054 Uiso 1 1 calc R . . 
C10 C -0.1114(3) 0.65040(15) 0.9459(5) 0.0302(7) Uani 1 1 d . . . 
C11 C 0.4452(3) 0.43036(16) 0.8851(4) 0.0271(7) Uani 1 1 d . . . 
C12 C 0.4091(3) 0.37212(17) 0.8867(4) 0.0292(7) Uani 1 1 d . . . 
H12 H 0.4478 0.3363 0.8799 0.035 Uiso 1 1 calc R . . 
C13 C 0.3045(3) 0.37761(14) 0.9003(4) 0.0272(7) Uani 1 1 d . . . 
C14 C 0.5554(3) 0.45109(15) 0.8816(5) 0.0315(8) Uani 1 1 d . . . 
C15 C 0.2234(3) 0.33029(15) 0.9127(5) 0.0315(8) Uani 1 1 d . . . 
H15A H 0.1970 0.3386 1.0206 0.047 Uiso 1 1 calc R . . 
H15B H 0.2591 0.2910 0.9289 0.047 Uiso 1 1 calc R . . 
H15C H 0.1611 0.3304 0.7967 0.047 Uiso 1 1 calc R . . 
  
loop_ 
 _atom_site_aniso_label 
 _atom_site_aniso_U_11 
 _atom_site_aniso_U_22 
 _atom_site_aniso_U_33 
 _atom_site_aniso_U_23 
 _atom_site_aniso_U_13 
 _atom_site_aniso_U_12 
Cu1 0.02030(19) 0.01830(18) 0.02660(18) 0.00066(16) 0.00817(14) 0.00367(15) 
Cu2 0.01594(18) 0.01787(17) 0.02789(18) 0.00060(17) 0.00866(13) -0.00098(15) 
Cu3 0.0241(2) 0.01904(19) 0.02826(18) 0.00047(18) 0.00897(14) 0.00010(17) 
N1 0.0164(12) 0.0216(12) 0.0238(12) -0.0001(12) 0.0073(9) 0.0004(11) 
N2 0.0164(12) 0.0176(13) 0.0222(11) 0.0005(10) 0.0069(9) -0.0003(10) 
N3 0.0186(13) 0.0236(14) 0.0270(13) 0.0004(11) 0.0089(10) 0.0001(11) 
N4 0.0224(13) 0.0201(14) 0.0236(12) 0.0003(10) 0.0085(10) -0.0018(11) 
N5 0.0282(14) 0.0181(13) 0.0230(12) 0.0007(11) 0.0061(10) 0.0031(11) 
N6 0.0220(13) 0.0209(12) 0.0272(13) 0.0007(11) 0.0088(10) 0.0034(11) 
F1 0.0402(12) 0.0173(10) 0.0846(16) 0.0068(10) 0.0207(11) 0.0033(9) 
F2 0.0563(14) 0.0505(14) 0.0531(13) 0.0098(11) 0.0306(11) 0.0228(11) 
F3 0.0264(10) 0.0377(12) 0.0658(14) -0.0053(10) -0.0049(10) 0.0081(9) 
F4 0.0488(13) 0.0405(12) 0.0532(13) -0.0147(10) 0.0064(10) 0.0081(11) 
F5 0.0749(16) 0.0368(13) 0.0477(13) 0.0086(10) 0.0265(11) 0.0144(12) 
F6 0.0307(13) 0.0555(16) 0.117(2) 0.0058(15) 0.0391(14) 0.0078(11) 
F7 0.0359(13) 0.0318(12) 0.1014(19) -0.0036(13) 0.0337(13) -0.0001(10) 
F9 0.0385(12) 0.0570(14) 0.0456(11) -0.0111(11) 0.0217(9) 0.0043(10) 
F8 0.0300(12) 0.0853(18) 0.0391(12) 0.0029(12) 0.0076(9) 0.0034(11) 
C1 0.0211(15) 0.0191(15) 0.0199(13) 0.0025(12) 0.0046(11) 0.0010(12) 
C2 0.0216(15) 0.0243(15) 0.0246(14) 0.0017(14) 0.0034(12) -0.0035(13) 
C3 0.0252(16) 0.0289(18) 0.0193(14) 0.0025(12) 0.0059(13) -0.0029(13) 
C4 0.0239(17) 0.0214(16) 0.0336(16) 0.0027(13) 0.0064(13) 0.0003(13) 
C5 0.0220(16) 0.0315(18) 0.0344(17) 0.0040(14) 0.0124(13) -0.0013(14) 
C6 0.0258(16) 0.0326(19) 0.0190(14) -0.0021(14) 0.0069(12) -0.0094(15) 
C7 0.0216(17) 0.0393(19) 0.0278(17) -0.0027(13) 0.0120(14) -0.0046(13) 
C8 0.0175(15) 0.0328(18) 0.0242(14) 0.0014(14) 0.0082(12) -0.0015(14) 
C9 0.0368(19) 0.037(2) 0.0378(18) -0.0013(16) 0.0176(15) -0.0146(16) 
C10 0.0226(16) 0.0308(18) 0.0391(18) 0.0020(14) 0.0122(13) 0.0036(14) 
C11 0.0335(18) 0.0240(17) 0.0242(16) -0.0033(13) 0.0092(13) 0.0042(15) 
C12 0.0376(19) 0.0225(16) 0.0268(16) -0.0019(14) 0.0086(14) 0.0145(15) 
C13 0.041(2) 0.0178(16) 0.0196(15) 0.0025(13) 0.0041(14) 0.0026(14) 
C14 0.0297(19) 0.032(2) 0.0332(18) -0.0045(14) 0.0106(15) 0.0113(14) 
C15 0.040(2) 0.0188(17) 0.0323(16) -0.0022(13) 0.0061(15) -0.0050(15) 
  
_geom_special_details 
; 
 All esds (except the esd in the dihedral angle between two l.s. planes) 
 are estimated using the full covariance matrix.  The cell esds are taken 
 into account individually in the estimation of esds in distances, angles 
 and torsion angles; correlations between esds in cell parameters are only 
 used when they are defined by crystal symmetry.  An approximate (isotropic) 
 treatment of cell esds is used for estimating esds involving l.s. planes. 
; 
  
loop_ 
 _geom_bond_atom_site_label_1 
 _geom_bond_atom_site_label_2 
 _geom_bond_distance 
 _geom_bond_site_symmetry_2 
 _geom_bond_publ_flag 
Cu1 N1 1.856(3) . ? 
Cu1 N6 1.863(3) . ? 
Cu2 N3 1.852(3) . ? 
Cu2 N2 1.853(3) . ? 
Cu3 N5 1.857(3) . ? 
Cu3 N4 1.861(3) . ? 
N1 C3 1.341(4) . ? 
N1 N2 1.379(4) . ? 
N2 C1 1.333(4) . ? 
N3 C8 1.346(4) . ? 
N3 N4 1.381(4) . ? 
N4 C6 1.329(4) . ? 
N5 C13 1.352(4) . ? 
N5 N6 1.375(4) . ? 
N6 C11 1.342(4) . ? 
F1 C4 1.348(4) . ? 
F2 C4 1.327(4) . ? 
F3 C4 1.337(4) . ? 
F4 C10 1.352(4) . ? 
F5 C10 1.327(4) . ? 
F6 C10 1.319(4) . ? 
F7 C14 1.353(4) . ? 
F9 C14 1.331(4) . ? 
F8 C14 1.341(4) . ? 
C1 C2 1.380(5) . ? 
C1 C4 1.483(4) . ? 
C2 C3 1.389(5) . ? 
C2 H2 0.9500 . ? 
C3 C5 1.498(5) . ? 
C5 H5A 0.9800 . ? 
C5 H5B 0.9800 . ? 
C5 H5C 0.9800 . ? 
C6 C7 1.399(5) . ? 
C6 C9 1.509(5) . ? 
C7 C8 1.374(5) . ? 
C7 H7 0.9500 . ? 
C8 C10 1.483(5) . ? 
C9 H9A 0.9800 . ? 
C9 H9B 0.9800 . ? 
C9 H9C 0.9800 . ? 
C11 C12 1.382(5) . ? 
C11 C14 1.490(5) . ? 
C12 C13 1.375(5) . ? 
C12 H12 0.9500 . ? 
C13 C15 1.504(5) . ? 
C15 H15A 0.9800 . ? 
C15 H15B 0.9800 . ? 
C15 H15C 0.9800 . ? 
  
loop_ 
 _geom_angle_atom_site_label_1 
 _geom_angle_atom_site_label_2 
 _geom_angle_atom_site_label_3 
 _geom_angle 
 _geom_angle_site_symmetry_1 
 _geom_angle_site_symmetry_3 
 _geom_angle_publ_flag 
N1 Cu1 N6 178.68(13) . . ? 
N3 Cu2 N2 178.07(12) . . ? 
N5 Cu3 N4 178.97(12) . . ? 
C3 N1 N2 108.3(3) . . ? 
C3 N1 Cu1 132.2(2) . . ? 
N2 N1 Cu1 119.49(19) . . ? 
C1 N2 N1 106.9(2) . . ? 
C1 N2 Cu2 133.6(2) . . ? 
N1 N2 Cu2 119.48(19) . . ? 
C8 N3 N4 106.6(2) . . ? 
C8 N3 Cu2 132.7(2) . . ? 
N4 N3 Cu2 120.46(18) . . ? 
C6 N4 N3 108.9(3) . . ? 
C6 N4 Cu3 132.7(2) . . ? 
N3 N4 Cu3 118.24(18) . . ? 
C13 N5 N6 108.2(3) . . ? 
C13 N5 Cu3 131.0(2) . . ? 
N6 N5 Cu3 120.8(2) . . ? 
C11 N6 N5 106.6(2) . . ? 
C11 N6 Cu1 133.7(3) . . ? 
N5 N6 Cu1 119.5(2) . . ? 
N2 C1 C2 111.0(3) . . ? 
N2 C1 C4 120.3(3) . . ? 
C2 C1 C4 128.6(3) . . ? 
C1 C2 C3 104.4(3) . . ? 
C1 C2 H2 127.8 . . ? 
C3 C2 H2 127.8 . . ? 
N1 C3 C2 109.5(3) . . ? 
N1 C3 C5 121.8(3) . . ? 
C2 C3 C5 128.7(3) . . ? 
F2 C4 F3 106.4(3) . . ? 
F2 C4 F1 106.2(3) . . ? 
F3 C4 F1 106.1(3) . . ? 
F2 C4 C1 113.7(3) . . ? 
F3 C4 C1 112.7(3) . . ? 
F1 C4 C1 111.2(3) . . ? 
C3 C5 H5A 109.5 . . ? 
C3 C5 H5B 109.5 . . ? 
H5A C5 H5B 109.5 . . ? 
C3 C5 H5C 109.5 . . ? 
H5A C5 H5C 109.5 . . ? 
H5B C5 H5C 109.5 . . ? 
N4 C6 C7 109.1(3) . . ? 
N4 C6 C9 121.8(3) . . ? 
C7 C6 C9 129.1(3) . . ? 
C8 C7 C6 104.8(3) . . ? 
C8 C7 H7 127.6 . . ? 
C6 C7 H7 127.6 . . ? 
N3 C8 C7 110.6(3) . . ? 
N3 C8 C10 120.2(3) . . ? 
C7 C8 C10 129.2(3) . . ? 
C6 C9 H9A 109.5 . . ? 
C6 C9 H9B 109.5 . . ? 
H9A C9 H9B 109.5 . . ? 
C6 C9 H9C 109.5 . . ? 
H9A C9 H9C 109.5 . . ? 
H9B C9 H9C 109.5 . . ? 
F6 C10 F5 108.8(3) . . ? 
F6 C10 F4 105.6(3) . . ? 
F5 C10 F4 104.5(3) . . ? 
F6 C10 C8 112.1(3) . . ? 
F5 C10 C8 113.0(3) . . ? 
F4 C10 C8 112.4(3) . . ? 
N6 C11 C12 111.0(3) . . ? 
N6 C11 C14 121.1(3) . . ? 
C12 C11 C14 127.8(3) . . ? 
C13 C12 C11 104.5(3) . . ? 
C13 C12 H12 127.7 . . ? 
C11 C12 H12 127.7 . . ? 
N5 C13 C12 109.7(3) . . ? 
N5 C13 C15 120.1(3) . . ? 
C12 C13 C15 130.2(4) . . ? 
F9 C14 F8 105.7(3) . . ? 
F9 C14 F7 104.9(3) . . ? 
F8 C14 F7 105.5(3) . . ? 
F9 C14 C11 113.4(3) . . ? 
F8 C14 C11 113.5(3) . . ? 
F7 C14 C11 113.1(3) . . ? 
C13 C15 H15A 109.5 . . ? 
C13 C15 H15B 109.5 . . ? 
H15A C15 H15B 109.5 . . ? 
C13 C15 H15C 109.5 . . ? 
H15A C15 H15C 109.5 . . ? 
H15B C15 H15C 109.5 . . ? 
  
_diffrn_measured_fraction_theta_max    1.000 
_diffrn_reflns_theta_full              25.99 
_diffrn_measured_fraction_theta_full   1.000 
_refine_diff_density_max    0.551 
_refine_diff_density_min   -0.259 
_refine_diff_density_rms    0.071 

#===END
  
data_dias54s 
  
_audit_creation_method            SHELXL-97 
_chemical_name_systematic 
; 
 ? 
; 
_chemical_name_common             [3-(CF3),5-(Ph)PzCu]3 
_chemical_melting_point           ? 
_chemical_formula_moiety          ? 
_chemical_formula_sum 
 'C30 H18 Cu3 F9 N6' 
_chemical_formula_weight          824.12 
  
loop_ 
 _atom_type_symbol 
 _atom_type_description 
 _atom_type_scat_dispersion_real 
 _atom_type_scat_dispersion_imag 
 _atom_type_scat_source 
 'C'  'C'   0.0033   0.0016 
 'International Tables Vol C Tables 4.2.6.8 and 6.1.1.4' 
 'H'  'H'   0.0000   0.0000 
 'International Tables Vol C Tables 4.2.6.8 and 6.1.1.4' 
 'N'  'N'   0.0061   0.0033 
 'International Tables Vol C Tables 4.2.6.8 and 6.1.1.4' 
 'F'  'F'   0.0171   0.0103 
 'International Tables Vol C Tables 4.2.6.8 and 6.1.1.4' 
 'Cu'  'Cu'   0.3201   1.2651 
 'International Tables Vol C Tables 4.2.6.8 and 6.1.1.4' 
  
_symmetry_cell_setting            Monoclinic 
_symmetry_space_group_name_H-M    P2(1)/c 
  
loop_ 
 _symmetry_equiv_pos_as_xyz 
 'x, y, z' 
 '-x, y+1/2, -z+1/2' 
 '-x, -y, -z' 
 'x, -y-1/2, z-1/2' 
  
_cell_length_a                    11.7498(4) 
_cell_length_b                    19.5123(7) 
_cell_length_c                    13.1595(5) 
_cell_angle_alpha                 90.00 
_cell_angle_beta                  90.6880(10) 
_cell_angle_gamma                 90.00 
_cell_volume                      3016.80(19) 
_cell_formula_units_Z             4 
_cell_measurement_temperature     100(2) 
_cell_measurement_reflns_used     8994 
_cell_measurement_theta_min       2.54 
_cell_measurement_theta_max       28.27 
  
_exptl_crystal_description        square 
_exptl_crystal_colour             colorless 
_exptl_crystal_size_max           0.23 
_exptl_crystal_size_mid           0.09 
_exptl_crystal_size_min           0.08 
_exptl_crystal_density_meas       0 
_exptl_crystal_density_diffrn     1.814 
_exptl_crystal_density_method     'not measured' 
_exptl_crystal_F_000              1632 
_exptl_absorpt_coefficient_mu     2.185 
_exptl_absorpt_correction_type    none 
_exptl_absorpt_correction_T_min   0.6334 
_exptl_absorpt_correction_T_max   0.8446 
_exptl_absorpt_process_details    SADABS 
  
_exptl_special_details 
; 
 ? 
; 
  
_diffrn_ambient_temperature       100(2) 
_diffrn_radiation_wavelength      0.71073 
_diffrn_radiation_type            MoK\a 
_diffrn_radiation_source          'fine-focus sealed tube' 
_diffrn_radiation_monochromator   graphite 
_diffrn_measurement_device_type   'CCD area detector' 
_diffrn_measurement_method        'phi and omega scans' 
_diffrn_detector_area_resol_mean  ? 
_diffrn_standards_number          ? 
_diffrn_standards_interval_count  ? 
_diffrn_standards_interval_time   ? 
_diffrn_standards_decay_%         ? 
_diffrn_reflns_number             25666 
_diffrn_reflns_av_R_equivalents   0.0234 
_diffrn_reflns_av_sigmaI/netI     0.0203 
_diffrn_reflns_limit_h_min        -15 
_diffrn_reflns_limit_h_max        14 
_diffrn_reflns_limit_k_min        -24 
_diffrn_reflns_limit_k_max        24 
_diffrn_reflns_limit_l_min        -16 
_diffrn_reflns_limit_l_max        16 
_diffrn_reflns_theta_min          1.73 
_diffrn_reflns_theta_max          27.00 
_reflns_number_total              6575 
_reflns_number_gt                 5966 
_reflns_threshold_expression      >2sigma(I) 
  
_computing_data_collection        'Bruker SMART' 
_computing_cell_refinement        'Bruker SMART' 
_computing_data_reduction         'Bruker SAINT' 
_computing_structure_solution     'SHELXS-97 (Sheldrick, 1990)' 
_computing_structure_refinement   'SHELXL-97 (Sheldrick, 1997)' 
_computing_molecular_graphics     'Bruker SHELXTL' 
_computing_publication_material   'Bruker SHELXTL' 
  
_refine_special_details 
; 
 Refinement of F^2^ against ALL reflections.  The weighted R-factor wR and 
 goodness of fit S are based on F^2^, conventional R-factors R are based 
 on F, with F set to zero for negative F^2^. The threshold expression of 
 F^2^ > 2sigma(F^2^) is used only for calculating R-factors(gt) etc. and is 
 not relevant to the choice of reflections for refinement.  R-factors based 
 on F^2^ are statistically about twice as large as those based on F, and R- 
 factors based on ALL data will be even larger. 
; 
  
_refine_ls_structure_factor_coef  Fsqd 
_refine_ls_matrix_type            full 
_refine_ls_weighting_scheme       calc 
_refine_ls_weighting_details 
 'calc w=1/[\s^2^(Fo^2^)+(0.0409P)^2^+2.2320P] where P=(Fo^2^+2Fc^2^)/3' 
_atom_sites_solution_primary      direct 
_atom_sites_solution_secondary    difmap 
_atom_sites_solution_hydrogens    geom 
_refine_ls_hydrogen_treatment     mixed 
_refine_ls_extinction_method      none 
_refine_ls_extinction_coef        ? 
_refine_ls_number_reflns          6575 
_refine_ls_number_parameters      433 
_refine_ls_number_restraints      0 
_refine_ls_R_factor_all           0.0348 
_refine_ls_R_factor_gt            0.0310 
_refine_ls_wR_factor_ref          0.0809 
_refine_ls_wR_factor_gt           0.0789 
_refine_ls_goodness_of_fit_ref    1.106 
_refine_ls_restrained_S_all       1.106 
_refine_ls_shift/su_max           0.002 
_refine_ls_shift/su_mean          0.000 
  
loop_ 
 _atom_site_label 
 _atom_site_type_symbol 
 _atom_site_fract_x 
 _atom_site_fract_y 
 _atom_site_fract_z 
 _atom_site_U_iso_or_equiv 
 _atom_site_adp_type 
 _atom_site_occupancy 
 _atom_site_symmetry_multiplicity 
 _atom_site_calc_flag 
 _atom_site_refinement_flags 
 _atom_site_disorder_assembly 
 _atom_site_disorder_group 
Cu1 Cu 0.63181(2) 1.057678(13) 0.516111(19) 0.02114(8) Uani 1 1 d . . . 
Cu2 Cu 0.74863(2) 0.991518(14) 0.31897(2) 0.02267(8) Uani 1 1 d . . . 
Cu3 Cu 0.83215(2) 0.942806(13) 0.535327(19) 0.02052(8) Uani 1 1 d . . . 
N1 N 0.57787(15) 1.07977(9) 0.38660(14) 0.0217(4) Uani 1 1 d . . . 
N2 N 0.62196(16) 1.04795(9) 0.30357(14) 0.0236(4) Uani 1 1 d . . . 
N3 N 0.88262(16) 0.94099(9) 0.33058(14) 0.0225(4) Uani 1 1 d . . . 
N4 N 0.92405(15) 0.92288(9) 0.42456(13) 0.0209(4) Uani 1 1 d . . . 
N5 N 0.74925(15) 0.97074(9) 0.64764(13) 0.0200(3) Uani 1 1 d . . . 
N6 N 0.68395(15) 1.02889(9) 0.64344(13) 0.0209(4) Uani 1 1 d . . . 
C1 C 0.57695(19) 1.07880(12) 0.22088(17) 0.0268(5) Uani 1 1 d . . . 
C2 C 0.50377(19) 1.13045(12) 0.24875(18) 0.0271(5) Uani 1 1 d . . . 
H2 H 0.4614 1.1601 0.2053 0.033 Uiso 1 1 calc R . . 
C3 C 0.50555(18) 1.12962(11) 0.35433(17) 0.0240(4) Uani 1 1 d . . . 
C4 C 0.6110(2) 1.05929(13) 0.11613(19) 0.0330(5) Uani 1 1 d . . . 
C5 C 0.44448(18) 1.17418(11) 0.42531(18) 0.0256(5) Uani 1 1 d . . . 
C6 C 0.4264(2) 1.24287(12) 0.3985(2) 0.0317(5) Uani 1 1 d . . . 
H6 H 0.4545 1.2599 0.3360 0.038 Uiso 1 1 calc R . . 
C7 C 0.3674(2) 1.28604(13) 0.4633(2) 0.0373(6) Uani 1 1 d . . . 
H7 H 0.3556 1.3326 0.4450 0.045 Uiso 1 1 calc R . . 
C8 C 0.3262(2) 1.26173(14) 0.5536(2) 0.0376(6) Uani 1 1 d . . . 
H8 H 0.2856 1.2916 0.5972 0.045 Uiso 1 1 calc R . . 
C9 C 0.3434(2) 1.19371(13) 0.5818(2) 0.0336(5) Uani 1 1 d . . . 
H9 H 0.3149 1.1771 0.6444 0.040 Uiso 1 1 calc R . . 
C10 C 0.40263(19) 1.15042(12) 0.51737(19) 0.0279(5) Uani 1 1 d . . . 
H10 H 0.4147 1.1040 0.5364 0.033 Uiso 1 1 calc R . . 
C11 C 1.02916(18) 0.89614(10) 0.41306(17) 0.0219(4) Uani 1 1 d . . . 
C12 C 1.05710(19) 0.89713(11) 0.31011(17) 0.0247(4) Uani 1 1 d . . . 
H12 H 1.1254 0.8817 0.2797 0.030 Uiso 1 1 calc R . . 
C13 C 0.96305(19) 0.92550(11) 0.26276(16) 0.0232(4) Uani 1 1 d . . . 
C14 C 1.09548(17) 0.86717(11) 0.49857(17) 0.0231(4) Uani 1 1 d . . . 
C15 C 1.08105(19) 0.88884(12) 0.59873(17) 0.0252(4) Uani 1 1 d . . . 
H15 H 1.0298 0.9252 0.6126 0.030 Uiso 1 1 calc R . . 
C16 C 1.1407(2) 0.85801(13) 0.67883(19) 0.0315(5) Uani 1 1 d . . . 
H16 H 1.1293 0.8729 0.7467 0.038 Uiso 1 1 calc R . . 
C17 C 1.2166(2) 0.80549(13) 0.6586(2) 0.0353(6) Uani 1 1 d . . . 
H17 H 1.2568 0.7839 0.7129 0.042 Uiso 1 1 calc R . . 
C18 C 1.2340(2) 0.78434(13) 0.5593(2) 0.0342(5) Uani 1 1 d . . . 
H18 H 1.2873 0.7490 0.5456 0.041 Uiso 1 1 calc R . . 
C19 C 1.17378(19) 0.81461(12) 0.48013(19) 0.0294(5) Uani 1 1 d . . . 
H19 H 1.1857 0.7995 0.4124 0.035 Uiso 1 1 calc R . . 
C20 C 0.9413(2) 0.93700(12) 0.15200(18) 0.0276(5) Uani 1 1 d . . . 
C21 C 0.66300(18) 1.04704(11) 0.73987(17) 0.0222(4) Uani 1 1 d . . . 
C22 C 0.71258(19) 1.00147(11) 0.80797(17) 0.0229(4) Uani 1 1 d . . . 
H22 H 0.7108 1.0027 0.8801 0.027 Uiso 1 1 calc R . . 
C23 C 0.76568(18) 0.95339(10) 0.74640(16) 0.0201(4) Uani 1 1 d . . . 
C24 C 0.5957(2) 1.10972(12) 0.76391(17) 0.0258(5) Uani 1 1 d . . . 
C25 C 0.82891(18) 0.89087(11) 0.77472(16) 0.0208(4) Uani 1 1 d . . . 
C26 C 0.89168(19) 0.88858(11) 0.86497(17) 0.0248(4) Uani 1 1 d . . . 
H26 H 0.8947 0.9277 0.9080 0.030 Uiso 1 1 calc R . . 
C27 C 0.9500(2) 0.82926(12) 0.89247(18) 0.0285(5) Uani 1 1 d . . . 
H27 H 0.9928 0.8278 0.9541 0.034 Uiso 1 1 calc R . . 
C28 C 0.9454(2) 0.77212(12) 0.82944(19) 0.0299(5) Uani 1 1 d . . . 
H28 H 0.9853 0.7316 0.8482 0.036 Uiso 1 1 calc R . . 
C29 C 0.8831(2) 0.77399(12) 0.73947(18) 0.0289(5) Uani 1 1 d . . . 
H29 H 0.8800 0.7348 0.6967 0.035 Uiso 1 1 calc R . . 
C30 C 0.82519(19) 0.83313(11) 0.71190(17) 0.0237(4) Uani 1 1 d . . . 
H30 H 0.7828 0.8344 0.6500 0.028 Uiso 1 1 calc R . . 
F1 F 0.64108(15) 0.99365(8) 0.10832(11) 0.0441(4) Uani 1 1 d . . . 
F2 F 0.70002(15) 1.09589(9) 0.08390(12) 0.0484(4) Uani 1 1 d . . . 
F3 F 0.52585(15) 1.07018(10) 0.05003(12) 0.0482(4) Uani 1 1 d . . . 
F4 F 0.90399(14) 1.00045(7) 0.13134(11) 0.0374(3) Uani 1 1 d . . . 
F5 F 0.86136(13) 0.89410(8) 0.11527(10) 0.0360(3) Uani 1 1 d . . . 
F6 F 1.03527(13) 0.92688(9) 0.09823(11) 0.0396(4) Uani 1 1 d . . . 
F7 F 0.62300(14) 1.16249(7) 0.70443(12) 0.0413(4) Uani 1 1 d . . . 
F8 F 0.48424(13) 1.10153(8) 0.75223(15) 0.0471(4) Uani 1 1 d . . . 
F9 F 0.61402(17) 1.12987(9) 0.85919(12) 0.0528(5) Uani 1 1 d . . . 
  
loop_ 
 _atom_site_aniso_label 
 _atom_site_aniso_U_11 
 _atom_site_aniso_U_22 
 _atom_site_aniso_U_33 
 _atom_site_aniso_U_23 
 _atom_site_aniso_U_13 
 _atom_site_aniso_U_12 
Cu1 0.02360(14) 0.01913(14) 0.02062(14) 0.00120(9) -0.00264(10) 0.00219(9) 
Cu2 0.02466(14) 0.02216(14) 0.02114(14) 0.00049(10) -0.00218(10) 0.00205(10) 
Cu3 0.02350(14) 0.01940(14) 0.01865(14) -0.00100(9) -0.00048(10) 0.00244(9) 
N1 0.0223(9) 0.0201(9) 0.0227(9) 0.0014(7) -0.0033(7) 0.0002(7) 
N2 0.0254(9) 0.0233(9) 0.0219(9) -0.0003(7) -0.0035(7) -0.0005(7) 
N3 0.0277(10) 0.0199(9) 0.0198(9) -0.0009(7) -0.0011(7) -0.0001(7) 
N4 0.0251(9) 0.0182(8) 0.0194(9) -0.0009(7) -0.0016(7) 0.0007(7) 
N5 0.0222(9) 0.0169(8) 0.0209(9) -0.0002(7) -0.0019(7) 0.0007(7) 
N6 0.0221(9) 0.0184(8) 0.0221(9) -0.0003(7) 0.0004(7) 0.0022(7) 
C1 0.0262(11) 0.0301(12) 0.0240(11) 0.0034(9) -0.0060(9) -0.0044(9) 
C2 0.0260(11) 0.0270(11) 0.0281(11) 0.0063(9) -0.0066(9) -0.0001(9) 
C3 0.0206(10) 0.0218(10) 0.0293(11) 0.0030(9) -0.0051(8) -0.0033(8) 
C4 0.0365(13) 0.0384(14) 0.0241(12) 0.0030(10) -0.0073(10) -0.0012(10) 
C5 0.0191(10) 0.0228(11) 0.0346(12) 0.0002(9) -0.0068(9) -0.0008(8) 
C6 0.0256(11) 0.0230(11) 0.0463(14) 0.0030(10) -0.0055(10) -0.0013(9) 
C7 0.0298(12) 0.0221(12) 0.0599(17) -0.0028(11) -0.0057(12) 0.0001(10) 
C8 0.0244(12) 0.0330(13) 0.0555(17) -0.0143(12) -0.0004(11) 0.0034(10) 
C9 0.0266(12) 0.0364(13) 0.0379(13) -0.0081(11) -0.0007(10) 0.0019(10) 
C10 0.0227(11) 0.0252(11) 0.0357(12) -0.0014(9) -0.0021(9) 0.0013(9) 
C11 0.0220(10) 0.0171(10) 0.0266(11) -0.0019(8) -0.0019(8) -0.0044(8) 
C12 0.0242(11) 0.0238(11) 0.0263(11) -0.0018(9) 0.0025(9) -0.0049(8) 
C13 0.0278(11) 0.0212(10) 0.0205(10) -0.0013(8) 0.0000(8) -0.0050(8) 
C14 0.0199(10) 0.0216(10) 0.0279(11) 0.0014(8) -0.0012(8) -0.0058(8) 
C15 0.0243(11) 0.0249(11) 0.0262(11) 0.0008(9) -0.0017(9) -0.0044(8) 
C16 0.0288(12) 0.0377(13) 0.0279(12) 0.0047(10) -0.0052(9) -0.0107(10) 
C17 0.0278(12) 0.0366(13) 0.0413(14) 0.0132(11) -0.0111(10) -0.0056(10) 
C18 0.0243(11) 0.0300(12) 0.0481(15) 0.0039(11) -0.0060(10) 0.0026(9) 
C19 0.0250(11) 0.0277(12) 0.0354(13) -0.0011(10) -0.0020(9) -0.0019(9) 
C20 0.0307(12) 0.0286(12) 0.0236(11) -0.0008(9) 0.0002(9) -0.0050(9) 
C21 0.0227(10) 0.0208(10) 0.0233(11) 0.0006(8) 0.0013(8) -0.0017(8) 
C22 0.0266(11) 0.0214(10) 0.0207(10) 0.0005(8) 0.0023(8) 0.0004(8) 
C23 0.0209(10) 0.0182(10) 0.0211(10) -0.0008(8) 0.0005(8) -0.0016(8) 
C24 0.0304(12) 0.0245(11) 0.0226(11) 0.0006(9) 0.0030(9) 0.0027(9) 
C25 0.0210(10) 0.0186(10) 0.0227(10) 0.0029(8) 0.0024(8) -0.0010(8) 
C26 0.0276(11) 0.0216(11) 0.0251(11) -0.0006(8) 0.0012(9) -0.0011(9) 
C27 0.0313(12) 0.0277(12) 0.0265(12) 0.0036(9) -0.0045(9) 0.0019(9) 
C28 0.0310(12) 0.0218(11) 0.0370(13) 0.0047(9) -0.0019(10) 0.0052(9) 
C29 0.0340(12) 0.0188(10) 0.0337(12) -0.0031(9) 0.0002(10) 0.0006(9) 
C30 0.0251(11) 0.0207(10) 0.0253(11) 0.0009(8) -0.0018(8) -0.0017(8) 
F1 0.0602(11) 0.0450(9) 0.0269(8) -0.0061(7) -0.0018(7) 0.0092(8) 
F2 0.0512(10) 0.0642(11) 0.0300(8) 0.0034(8) 0.0073(7) -0.0129(8) 
F3 0.0490(10) 0.0680(12) 0.0273(8) -0.0010(7) -0.0153(7) 0.0083(8) 
F4 0.0508(9) 0.0325(8) 0.0289(7) 0.0096(6) -0.0011(7) -0.0015(6) 
F5 0.0425(8) 0.0405(8) 0.0248(7) -0.0012(6) -0.0057(6) -0.0138(7) 
F6 0.0378(8) 0.0568(10) 0.0242(7) -0.0016(7) 0.0067(6) -0.0024(7) 
F7 0.0509(9) 0.0218(7) 0.0517(9) 0.0083(6) 0.0185(7) 0.0078(6) 
F8 0.0274(8) 0.0325(8) 0.0816(12) -0.0072(8) 0.0074(8) 0.0058(6) 
F9 0.0813(13) 0.0469(10) 0.0299(8) -0.0123(7) -0.0091(8) 0.0328(9) 
  
_geom_special_details 
; 
 All esds (except the esd in the dihedral angle between two l.s. planes) 
 are estimated using the full covariance matrix.  The cell esds are taken 
 into account individually in the estimation of esds in distances, angles 
 and torsion angles; correlations between esds in cell parameters are only 
 used when they are defined by crystal symmetry.  An approximate (isotropic) 
 treatment of cell esds is used for estimating esds involving l.s. planes. 
; 
  
loop_ 
 _geom_bond_atom_site_label_1 
 _geom_bond_atom_site_label_2 
 _geom_bond_distance 
 _geom_bond_site_symmetry_2 
 _geom_bond_publ_flag 
Cu1 N1 1.8618(18) . ? 
Cu1 N6 1.8638(18) . ? 
Cu2 N2 1.8604(19) . ? 
Cu2 N3 1.8623(19) . ? 
Cu3 N5 1.8614(18) . ? 
Cu3 N4 1.8653(18) . ? 
N1 C3 1.356(3) . ? 
N1 N2 1.364(3) . ? 
N2 C1 1.346(3) . ? 
N3 C13 1.342(3) . ? 
N3 N4 1.370(3) . ? 
N4 C11 1.351(3) . ? 
N5 C23 1.355(3) . ? 
N5 N6 1.370(2) . ? 
N6 C21 1.343(3) . ? 
C1 C2 1.377(3) . ? 
C1 C4 1.489(3) . ? 
C2 C3 1.389(3) . ? 
C2 H2 0.9500 . ? 
C3 C5 1.469(3) . ? 
C4 F1 1.333(3) . ? 
C4 F3 1.335(3) . ? 
C4 F2 1.340(3) . ? 
C5 C10 1.392(3) . ? 
C5 C6 1.402(3) . ? 
C6 C7 1.390(4) . ? 
C6 H6 0.9500 . ? 
C7 C8 1.373(4) . ? 
C7 H7 0.9500 . ? 
C8 C9 1.392(4) . ? 
C8 H8 0.9500 . ? 
C9 C10 1.390(3) . ? 
C9 H9 0.9500 . ? 
C10 H10 0.9500 . ? 
C11 C12 1.398(3) . ? 
C11 C14 1.474(3) . ? 
C12 C13 1.378(3) . ? 
C12 H12 0.9500 . ? 
C13 C20 1.494(3) . ? 
C14 C15 1.396(3) . ? 
C14 C19 1.401(3) . ? 
C15 C16 1.395(3) . ? 
C15 H15 0.9500 . ? 
C16 C17 1.386(4) . ? 
C16 H16 0.9500 . ? 
C17 C18 1.388(4) . ? 
C17 H17 0.9500 . ? 
C18 C19 1.384(3) . ? 
C18 H18 0.9500 . ? 
C19 H19 0.9500 . ? 
C20 F6 1.333(3) . ? 
C20 F4 1.340(3) . ? 
C20 F5 1.344(3) . ? 
C21 C22 1.386(3) . ? 
C21 C24 1.492(3) . ? 
C22 C23 1.392(3) . ? 
C22 H22 0.9500 . ? 
C23 C25 1.474(3) . ? 
C24 F8 1.327(3) . ? 
C24 F9 1.329(3) . ? 
C24 F7 1.335(3) . ? 
C25 C26 1.391(3) . ? 
C25 C30 1.398(3) . ? 
C26 C27 1.391(3) . ? 
C26 H26 0.9500 . ? 
C27 C28 1.390(3) . ? 
C27 H27 0.9500 . ? 
C28 C29 1.385(3) . ? 
C28 H28 0.9500 . ? 
C29 C30 1.386(3) . ? 
C29 H29 0.9500 . ? 
C30 H30 0.9500 . ? 
  
loop_ 
 _geom_angle_atom_site_label_1 
 _geom_angle_atom_site_label_2 
 _geom_angle_atom_site_label_3 
 _geom_angle 
 _geom_angle_site_symmetry_1 
 _geom_angle_site_symmetry_3 
 _geom_angle_publ_flag 
N1 Cu1 N6 175.83(8) . . ? 
N2 Cu2 N3 175.31(8) . . ? 
N5 Cu3 N4 174.17(8) . . ? 
C3 N1 N2 108.55(17) . . ? 
C3 N1 Cu1 131.13(16) . . ? 
N2 N1 Cu1 119.95(14) . . ? 
C1 N2 N1 107.13(18) . . ? 
C1 N2 Cu2 131.20(17) . . ? 
N1 N2 Cu2 119.55(14) . . ? 
C13 N3 N4 107.27(18) . . ? 
C13 N3 Cu2 131.75(16) . . ? 
N4 N3 Cu2 120.10(14) . . ? 
C11 N4 N3 108.29(17) . . ? 
C11 N4 Cu3 134.96(15) . . ? 
N3 N4 Cu3 116.67(14) . . ? 
C23 N5 N6 108.59(17) . . ? 
C23 N5 Cu3 128.22(15) . . ? 
N6 N5 Cu3 120.56(13) . . ? 
C21 N6 N5 106.81(17) . . ? 
C21 N6 Cu1 135.06(15) . . ? 
N5 N6 Cu1 117.62(13) . . ? 
N2 C1 C2 110.6(2) . . ? 
N2 C1 C4 121.8(2) . . ? 
C2 C1 C4 127.5(2) . . ? 
C1 C2 C3 104.8(2) . . ? 
C1 C2 H2 127.6 . . ? 
C3 C2 H2 127.6 . . ? 
N1 C3 C2 108.9(2) . . ? 
N1 C3 C5 122.3(2) . . ? 
C2 C3 C5 128.8(2) . . ? 
F1 C4 F3 107.5(2) . . ? 
F1 C4 F2 106.2(2) . . ? 
F3 C4 F2 106.9(2) . . ? 
F1 C4 C1 113.0(2) . . ? 
F3 C4 C1 110.8(2) . . ? 
F2 C4 C1 112.1(2) . . ? 
C10 C5 C6 118.9(2) . . ? 
C10 C5 C3 122.4(2) . . ? 
C6 C5 C3 118.7(2) . . ? 
C7 C6 C5 120.0(2) . . ? 
C7 C6 H6 120.0 . . ? 
C5 C6 H6 120.0 . . ? 
C8 C7 C6 120.4(2) . . ? 
C8 C7 H7 119.8 . . ? 
C6 C7 H7 119.8 . . ? 
C7 C8 C9 120.5(2) . . ? 
C7 C8 H8 119.7 . . ? 
C9 C8 H8 119.7 . . ? 
C10 C9 C8 119.3(3) . . ? 
C10 C9 H9 120.4 . . ? 
C8 C9 H9 120.4 . . ? 
C9 C10 C5 120.9(2) . . ? 
C9 C10 H10 119.6 . . ? 
C5 C10 H10 119.6 . . ? 
N4 C11 C12 109.20(19) . . ? 
N4 C11 C14 122.6(2) . . ? 
C12 C11 C14 128.1(2) . . ? 
C13 C12 C11 104.3(2) . . ? 
C13 C12 H12 127.8 . . ? 
C11 C12 H12 127.8 . . ? 
N3 C13 C12 110.91(19) . . ? 
N3 C13 C20 120.1(2) . . ? 
C12 C13 C20 128.9(2) . . ? 
C15 C14 C19 118.2(2) . . ? 
C15 C14 C11 122.4(2) . . ? 
C19 C14 C11 119.4(2) . . ? 
C16 C15 C14 121.1(2) . . ? 
C16 C15 H15 119.4 . . ? 
C14 C15 H15 119.4 . . ? 
C17 C16 C15 119.5(2) . . ? 
C17 C16 H16 120.3 . . ? 
C15 C16 H16 120.3 . . ? 
C16 C17 C18 120.2(2) . . ? 
C16 C17 H17 119.9 . . ? 
C18 C17 H17 119.9 . . ? 
C19 C18 C17 120.1(2) . . ? 
C19 C18 H18 119.9 . . ? 
C17 C18 H18 119.9 . . ? 
C18 C19 C14 120.8(2) . . ? 
C18 C19 H19 119.6 . . ? 
C14 C19 H19 119.6 . . ? 
F6 C20 F4 107.46(19) . . ? 
F6 C20 F5 107.25(19) . . ? 
F4 C20 F5 106.08(19) . . ? 
F6 C20 C13 111.3(2) . . ? 
F4 C20 C13 112.86(19) . . ? 
F5 C20 C13 111.60(19) . . ? 
N6 C21 C22 111.18(19) . . ? 
N6 C21 C24 121.34(19) . . ? 
C22 C21 C24 127.5(2) . . ? 
C21 C22 C23 104.11(19) . . ? 
C21 C22 H22 127.9 . . ? 
C23 C22 H22 127.9 . . ? 
N5 C23 C22 109.29(18) . . ? 
N5 C23 C25 121.01(19) . . ? 
C22 C23 C25 129.7(2) . . ? 
F8 C24 F9 107.0(2) . . ? 
F8 C24 F7 105.57(19) . . ? 
F9 C24 F7 106.7(2) . . ? 
F8 C24 C21 113.67(19) . . ? 
F9 C24 C21 111.25(19) . . ? 
F7 C24 C21 112.12(18) . . ? 
C26 C25 C30 119.4(2) . . ? 
C26 C25 C23 120.20(19) . . ? 
C30 C25 C23 120.36(19) . . ? 
C27 C26 C25 120.2(2) . . ? 
C27 C26 H26 119.9 . . ? 
C25 C26 H26 119.9 . . ? 
C28 C27 C26 119.8(2) . . ? 
C28 C27 H27 120.1 . . ? 
C26 C27 H27 120.1 . . ? 
C29 C28 C27 120.3(2) . . ? 
C29 C28 H28 119.8 . . ? 
C27 C28 H28 119.8 . . ? 
C28 C29 C30 119.9(2) . . ? 
C28 C29 H29 120.1 . . ? 
C30 C29 H29 120.1 . . ? 
C29 C30 C25 120.3(2) . . ? 
C29 C30 H30 119.8 . . ? 
C25 C30 H30 119.8 . . ? 
  
_diffrn_measured_fraction_theta_max    1.000 
_diffrn_reflns_theta_full              27.00 
_diffrn_measured_fraction_theta_full   1.000 
_refine_diff_density_max    1.028 
_refine_diff_density_min   -0.224 
_refine_diff_density_rms    0.083 

#===END
  
data_dias15s 
  
_audit_creation_method            SHELXL-97 
_chemical_name_systematic 
; 
 ? 
; 
_chemical_name_common             [3,5-(CF3)2Pz]3 
_chemical_melting_point           ? 
_chemical_formula_moiety          ? 
_chemical_formula_sum 
 'C15 H3 Cu3 F18 N6' 
_chemical_formula_weight          799.85 
  
loop_ 
 _atom_type_symbol 
 _atom_type_description 
 _atom_type_scat_dispersion_real 
 _atom_type_scat_dispersion_imag 
 _atom_type_scat_source 
 'C'  'C'   0.0033   0.0016 
 'International Tables Vol C Tables 4.2.6.8 and 6.1.1.4' 
 'H'  'H'   0.0000   0.0000 
 'International Tables Vol C Tables 4.2.6.8 and 6.1.1.4' 
 'N'  'N'   0.0061   0.0033 
 'International Tables Vol C Tables 4.2.6.8 and 6.1.1.4' 
 'F'  'F'   0.0171   0.0103 
 'International Tables Vol C Tables 4.2.6.8 and 6.1.1.4' 
 'Cu'  'Cu'   0.3201   1.2651 
 'International Tables Vol C Tables 4.2.6.8 and 6.1.1.4' 
  
_symmetry_cell_setting            Triclinic 
_symmetry_space_group_name_H-M    P-1 
  
loop_ 
 _symmetry_equiv_pos_as_xyz 
 'x, y, z' 
 '-x, -y, -z' 
  
_cell_length_a                    9.1553(4) 
_cell_length_b                    11.3906(5) 
_cell_length_c                    12.2324(5) 
_cell_angle_alpha                 66.4070(10) 
_cell_angle_beta                  74.4530(10) 
_cell_angle_gamma                 78.5470(10) 
_cell_volume                      1120.21(8) 
_cell_formula_units_Z             2 
_cell_measurement_temperature     100(2) 
_cell_measurement_reflns_used     7821 
_cell_measurement_theta_min       2.32 
_cell_measurement_theta_max       28.27 
  
_exptl_crystal_description        parallelpipe 
_exptl_crystal_colour             colorless 
_exptl_crystal_size_max           0.16 
_exptl_crystal_size_mid           0.16 
_exptl_crystal_size_min           0.09 
_exptl_crystal_density_meas       0 
_exptl_crystal_density_diffrn     2.371 
_exptl_crystal_density_method     'not measured' 
_exptl_crystal_F_000              768 
_exptl_absorpt_coefficient_mu     2.992 
_exptl_absorpt_correction_type    none 
_exptl_absorpt_correction_T_min   0.6460 
_exptl_absorpt_correction_T_max   0.7745 
_exptl_absorpt_process_details    SADABS 
  
_exptl_special_details 
; 
 ? 
; 
  
_diffrn_ambient_temperature       100(2) 
_diffrn_radiation_wavelength      0.71073 
_diffrn_radiation_type            MoK\a 
_diffrn_radiation_source          'fine-focus sealed tube' 
_diffrn_radiation_monochromator   graphite 
_diffrn_measurement_device_type   'CCD area detector' 
_diffrn_measurement_method        'phi and omega scans' 
_diffrn_detector_area_resol_mean  ? 
_diffrn_standards_number          ? 
_diffrn_standards_interval_count  ? 
_diffrn_standards_interval_time   ? 
_diffrn_standards_decay_%         ? 
_diffrn_reflns_number             8908 
_diffrn_reflns_av_R_equivalents   0.0316 
_diffrn_reflns_av_sigmaI/netI     0.0414 
_diffrn_reflns_limit_h_min        -11 
_diffrn_reflns_limit_h_max        11 
_diffrn_reflns_limit_k_min        -14 
_diffrn_reflns_limit_k_max        14 
_diffrn_reflns_limit_l_min        -15 
_diffrn_reflns_limit_l_max        15 
_diffrn_reflns_theta_min          1.86 
_diffrn_reflns_theta_max          26.00 
_reflns_number_total              4354 
_reflns_number_gt                 3985 
_reflns_threshold_expression      >2sigma(I) 
  
_computing_data_collection        'Bruker SMART' 
_computing_cell_refinement        'Bruker SMART' 
_computing_data_reduction         'Bruker SAINT' 
_computing_structure_solution     'SHELXS-97 (Sheldrick, 1990)' 
_computing_structure_refinement   'SHELXL-97 (Sheldrick, 1997)' 
_computing_molecular_graphics     'Bruker SHELXTL' 
_computing_publication_material   'Bruker SHELXTL' 
  
_refine_special_details 
; 
 Refinement of F^2^ against ALL reflections.  The weighted R-factor wR and 
 goodness of fit S are based on F^2^, conventional R-factors R are based 
 on F, with F set to zero for negative F^2^. The threshold expression of 
 F^2^ > 2sigma(F^2^) is used only for calculating R-factors(gt) etc. and is 
 not relevant to the choice of reflections for refinement.  R-factors based 
 on F^2^ are statistically about twice as large as those based on F, and R- 
 factors based on ALL data will be even larger. 
; 
  
_refine_ls_structure_factor_coef  Fsqd 
_refine_ls_matrix_type            full 
_refine_ls_weighting_scheme       calc 
_refine_ls_weighting_details 
 'calc w=1/[\s^2^(Fo^2^)+(0.0653P)^2^+0.3364P] where P=(Fo^2^+2Fc^2^)/3' 
_atom_sites_solution_primary      direct 
_atom_sites_solution_secondary    difmap 
_atom_sites_solution_hydrogens    geom 
_refine_ls_hydrogen_treatment     mixed 
_refine_ls_extinction_method      none 
_refine_ls_extinction_coef        ? 
_refine_ls_number_reflns          4354 
_refine_ls_number_parameters      379 
_refine_ls_number_restraints      0 
_refine_ls_R_factor_all           0.0383 
_refine_ls_R_factor_gt            0.0356 
_refine_ls_wR_factor_ref          0.0968 
_refine_ls_wR_factor_gt           0.0939 
_refine_ls_goodness_of_fit_ref    1.048 
_refine_ls_restrained_S_all       1.048 
_refine_ls_shift/su_max           0.002 
_refine_ls_shift/su_mean          0.000 
  
loop_ 
 _atom_site_label 
 _atom_site_type_symbol 
 _atom_site_fract_x 
 _atom_site_fract_y 
 _atom_site_fract_z 
 _atom_site_U_iso_or_equiv 
 _atom_site_adp_type 
 _atom_site_occupancy 
 _atom_site_symmetry_multiplicity 
 _atom_site_calc_flag 
 _atom_site_refinement_flags 
 _atom_site_disorder_assembly 
 _atom_site_disorder_group 
Cu1 Cu 0.89667(3) 0.93476(3) 0.42345(3) 0.01925(11) Uani 1 1 d . . . 
Cu2 Cu 0.61799(3) 1.10012(3) 0.54157(3) 0.01880(11) Uani 1 1 d . . . 
Cu3 Cu 0.74136(3) 0.81898(3) 0.71197(3) 0.01863(11) Uani 1 1 d . . . 
N1 N 0.8194(2) 1.0956(2) 0.32599(19) 0.0188(4) Uani 1 1 d . . . 
N2 N 0.7087(2) 1.1683(2) 0.37696(19) 0.0190(4) Uani 1 1 d . . . 
N3 N 0.5237(2) 1.0307(2) 0.70489(19) 0.0187(4) Uani 1 1 d . . . 
N4 N 0.5717(2) 0.9095(2) 0.77683(19) 0.0184(4) Uani 1 1 d . . . 
N5 N 0.9080(2) 0.7280(2) 0.64421(19) 0.0199(4) Uani 1 1 d . . . 
N6 N 0.9683(2) 0.7730(2) 0.52185(19) 0.0184(4) Uani 1 1 d . . . 
C1 C 0.8542(3) 1.1637(3) 0.2051(2) 0.0190(5) Uani 1 1 d . . . 
C2 C 0.7671(3) 1.2806(2) 0.1764(2) 0.0193(5) Uani 1 1 d . . . 
H2 H 0.7680 1.3468 0.0983 0.023 Uiso 1 1 calc R . . 
C3 C 0.6783(3) 1.2795(2) 0.2870(2) 0.0186(5) Uani 1 1 d . . . 
C4 C 0.9723(3) 1.1081(3) 0.1230(2) 0.0238(6) Uani 1 1 d . . . 
C5 C 0.5573(3) 1.3802(3) 0.3134(2) 0.0227(6) Uani 1 1 d . . . 
C6 C 0.4086(3) 1.0787(3) 0.7747(2) 0.0179(5) Uani 1 1 d . . . 
C7 C 0.3793(3) 0.9903(2) 0.8931(2) 0.0186(5) Uani 1 1 d . . . 
H7 H 0.3047 0.9994 0.9610 0.022 Uiso 1 1 calc R . . 
C8 C 0.4840(3) 0.8860(3) 0.8894(2) 0.0188(5) Uani 1 1 d . . . 
C9 C 0.3328(3) 1.2112(3) 0.7208(2) 0.0203(5) Uani 1 1 d . . . 
C10 C 0.5067(3) 0.7598(3) 0.9903(2) 0.0228(6) Uani 1 1 d . . . 
C11 C 0.9768(3) 0.6090(2) 0.6923(2) 0.0184(5) Uani 1 1 d . . . 
C12 C 1.0821(3) 0.5735(3) 0.6033(2) 0.0197(5) Uani 1 1 d . . . 
H12 H 1.1459 0.4949 0.6122 0.024 Uiso 1 1 calc R . . 
C13 C 1.0720(3) 0.6798(3) 0.4987(2) 0.0182(5) Uani 1 1 d . . . 
C14 C 0.9320(3) 0.5317(3) 0.8261(2) 0.0241(6) Uani 1 1 d . . . 
C15 C 1.1576(3) 0.6996(3) 0.3705(2) 0.0219(5) Uani 1 1 d . . . 
F1 F 0.96252(19) 0.98427(16) 0.15154(16) 0.0311(4) Uani 1 1 d . . . 
F2 F 1.11343(19) 1.1171(2) 0.1264(2) 0.0458(5) Uani 1 1 d . . . 
F3 F 0.9564(2) 1.16923(19) 0.00780(15) 0.0466(5) Uani 1 1 d . . . 
F4 F 0.5667(3) 1.49100(18) 0.21988(17) 0.0509(6) Uani 1 1 d . . . 
F5 F 0.56759(19) 1.40162(18) 0.41001(16) 0.0331(4) Uani 1 1 d . . . 
F6 F 0.41786(19) 1.3459(2) 0.3380(2) 0.0432(5) Uani 1 1 d . . . 
F7 F 0.28526(19) 1.22617(16) 0.62048(14) 0.0303(4) Uani 1 1 d . . . 
F8 F 0.42566(19) 1.30153(16) 0.68647(16) 0.0301(4) Uani 1 1 d . . . 
F9 F 0.21117(18) 1.23628(16) 0.79931(15) 0.0282(4) Uani 1 1 d . . . 
F10 F 0.5221(2) 0.66020(16) 0.95517(16) 0.0353(4) Uani 1 1 d . . . 
F11 F 0.6308(2) 0.74907(17) 1.03190(15) 0.0326(4) Uani 1 1 d . . . 
F12 F 0.3879(2) 0.74467(18) 1.08399(16) 0.0431(5) Uani 1 1 d . . . 
F13 F 0.8935(2) 0.60570(16) 0.89269(14) 0.0314(4) Uani 1 1 d . . . 
F14 F 0.8143(2) 0.46623(19) 0.85255(16) 0.0407(5) Uani 1 1 d . . . 
F15 F 1.0480(2) 0.44728(18) 0.86522(15) 0.0431(5) Uani 1 1 d . . . 
F16 F 1.2255(2) 0.80814(18) 0.31811(15) 0.0338(4) Uani 1 1 d . . . 
F17 F 1.06657(18) 0.70685(17) 0.29845(14) 0.0289(4) Uani 1 1 d . . . 
F18 F 1.2648(2) 0.60242(18) 0.36849(16) 0.0370(4) Uani 1 1 d . . . 
  
loop_ 
 _atom_site_aniso_label 
 _atom_site_aniso_U_11 
 _atom_site_aniso_U_22 
 _atom_site_aniso_U_33 
 _atom_site_aniso_U_23 
 _atom_site_aniso_U_13 
 _atom_site_aniso_U_12 
Cu1 0.02463(19) 0.01568(19) 0.01182(18) -0.00226(14) -0.00090(13) 0.00025(13) 
Cu2 0.02473(19) 0.0174(2) 0.00863(17) -0.00220(14) 0.00072(13) -0.00125(13) 
Cu3 0.02284(18) 0.01696(19) 0.01178(17) -0.00430(13) 0.00017(13) 0.00011(13) 
N1 0.0235(10) 0.0177(11) 0.0120(10) -0.0040(9) -0.0002(8) -0.0029(8) 
N2 0.0244(11) 0.0173(11) 0.0126(10) -0.0055(9) -0.0014(8) 0.0003(8) 
N3 0.0237(10) 0.0179(11) 0.0131(10) -0.0048(9) -0.0031(8) -0.0018(8) 
N4 0.0233(10) 0.0175(11) 0.0111(10) -0.0027(8) -0.0017(8) -0.0026(8) 
N5 0.0243(11) 0.0205(11) 0.0108(10) -0.0033(9) -0.0002(8) -0.0034(9) 
N6 0.0229(10) 0.0182(11) 0.0111(9) -0.0040(8) 0.0001(8) -0.0035(8) 
C1 0.0236(12) 0.0212(13) 0.0094(11) -0.0024(10) 0.0009(9) -0.0089(10) 
C2 0.0263(13) 0.0196(13) 0.0091(11) -0.0017(10) -0.0012(9) -0.0070(10) 
C3 0.0239(12) 0.0153(12) 0.0134(11) -0.0010(10) -0.0036(9) -0.0047(10) 
C4 0.0314(14) 0.0242(14) 0.0127(12) -0.0061(11) 0.0015(10) -0.0058(11) 
C5 0.0304(14) 0.0175(13) 0.0165(12) -0.0036(10) -0.0043(10) -0.0004(11) 
C6 0.0168(11) 0.0219(13) 0.0147(11) -0.0071(10) 0.0000(9) -0.0047(10) 
C7 0.0210(11) 0.0201(13) 0.0122(11) -0.0060(10) 0.0018(9) -0.0038(10) 
C8 0.0209(12) 0.0222(14) 0.0105(11) -0.0034(10) 0.0007(9) -0.0070(10) 
C9 0.0224(12) 0.0210(14) 0.0150(12) -0.0057(10) -0.0016(10) -0.0023(10) 
C10 0.0252(13) 0.0248(15) 0.0138(12) -0.0043(11) 0.0013(10) -0.0060(11) 
C11 0.0238(12) 0.0142(12) 0.0160(12) -0.0038(10) -0.0059(10) -0.0007(10) 
C12 0.0212(12) 0.0193(13) 0.0179(12) -0.0069(10) -0.0040(10) -0.0007(10) 
C13 0.0181(11) 0.0195(13) 0.0175(12) -0.0088(10) -0.0019(9) -0.0008(9) 
C14 0.0347(14) 0.0179(13) 0.0156(13) -0.0039(11) -0.0041(11) -0.0001(11) 
C15 0.0210(12) 0.0249(14) 0.0165(13) -0.0062(11) 0.0007(10) -0.0046(10) 
F1 0.0356(9) 0.0244(9) 0.0302(9) -0.0146(7) 0.0064(7) -0.0047(7) 
F2 0.0247(9) 0.0662(14) 0.0613(13) -0.0467(12) 0.0088(8) -0.0114(9) 
F3 0.0714(13) 0.0397(11) 0.0104(8) -0.0052(8) 0.0036(8) 0.0088(10) 
F4 0.0764(14) 0.0216(10) 0.0248(10) 0.0028(8) 0.0048(9) 0.0150(9) 
F5 0.0353(9) 0.0379(10) 0.0329(9) -0.0236(8) -0.0097(7) 0.0077(8) 
F6 0.0248(8) 0.0449(12) 0.0732(15) -0.0379(11) -0.0114(9) 0.0033(8) 
F7 0.0408(9) 0.0288(9) 0.0214(8) -0.0096(7) -0.0132(7) 0.0061(7) 
F8 0.0300(8) 0.0191(8) 0.0354(9) -0.0049(7) -0.0045(7) -0.0042(7) 
F9 0.0269(8) 0.0275(9) 0.0230(8) -0.0101(7) 0.0012(6) 0.0058(7) 
F10 0.0601(11) 0.0177(9) 0.0287(9) -0.0042(7) -0.0177(8) -0.0030(8) 
F11 0.0393(9) 0.0303(10) 0.0241(8) 0.0017(7) -0.0153(7) -0.0077(7) 
F12 0.0383(10) 0.0381(11) 0.0216(9) 0.0070(8) 0.0134(7) -0.0011(8) 
F13 0.0502(10) 0.0259(9) 0.0149(8) -0.0083(7) -0.0021(7) -0.0015(7) 
F14 0.0589(12) 0.0400(11) 0.0198(9) -0.0017(8) -0.0007(8) -0.0282(9) 
F15 0.0552(12) 0.0367(11) 0.0200(8) -0.0022(8) -0.0105(8) 0.0197(9) 
F16 0.0392(9) 0.0357(10) 0.0247(9) -0.0125(8) 0.0100(7) -0.0200(8) 
F17 0.0297(8) 0.0405(10) 0.0173(8) -0.0121(7) -0.0021(6) -0.0063(7) 
F18 0.0368(9) 0.0394(11) 0.0243(9) -0.0129(8) 0.0002(7) 0.0130(8) 
  
_geom_special_details 
; 
 All esds (except the esd in the dihedral angle between two l.s. planes) 
 are estimated using the full covariance matrix.  The cell esds are taken 
 into account individually in the estimation of esds in distances, angles 
 and torsion angles; correlations between esds in cell parameters are only 
 used when they are defined by crystal symmetry.  An approximate (isotropic) 
 treatment of cell esds is used for estimating esds involving l.s. planes. 
; 
  
loop_ 
 _geom_bond_atom_site_label_1 
 _geom_bond_atom_site_label_2 
 _geom_bond_distance 
 _geom_bond_site_symmetry_2 
 _geom_bond_publ_flag 
Cu1 N6 1.855(2) . ? 
Cu1 N1 1.862(2) . ? 
Cu2 N3 1.856(2) . ? 
Cu2 N2 1.859(2) . ? 
Cu3 N4 1.861(2) . ? 
Cu3 N5 1.863(2) . ? 
N1 C1 1.348(3) . ? 
N1 N2 1.358(3) . ? 
N2 C3 1.342(3) . ? 
N3 C6 1.342(3) . ? 
N3 N4 1.366(3) . ? 
N4 C8 1.345(3) . ? 
N5 C11 1.342(3) . ? 
N5 N6 1.365(3) . ? 
N6 C13 1.344(3) . ? 
C1 C2 1.374(4) . ? 
C1 C4 1.494(4) . ? 
C2 C3 1.376(3) . ? 
C2 H2 0.9500 . ? 
C3 C5 1.499(3) . ? 
C4 F1 1.326(3) . ? 
C4 F2 1.329(3) . ? 
C4 F3 1.333(3) . ? 
C5 F4 1.321(3) . ? 
C5 F5 1.328(3) . ? 
C5 F6 1.331(3) . ? 
C6 C7 1.384(3) . ? 
C6 C9 1.492(4) . ? 
C7 C8 1.379(4) . ? 
C7 H7 0.9500 . ? 
C8 C10 1.494(4) . ? 
C9 F9 1.328(3) . ? 
C9 F8 1.330(3) . ? 
C9 F7 1.346(3) . ? 
C10 F11 1.331(3) . ? 
C10 F12 1.332(3) . ? 
C10 F10 1.336(3) . ? 
C11 C12 1.383(3) . ? 
C11 C14 1.500(3) . ? 
C12 C13 1.375(4) . ? 
C12 H12 0.9500 . ? 
C13 C15 1.501(3) . ? 
C14 F14 1.328(3) . ? 
C14 F13 1.333(3) . ? 
C14 F15 1.334(3) . ? 
C15 F18 1.329(3) . ? 
C15 F16 1.335(3) . ? 
C15 F17 1.336(3) . ? 
  
loop_ 
 _geom_angle_atom_site_label_1 
 _geom_angle_atom_site_label_2 
 _geom_angle_atom_site_label_3 
 _geom_angle 
 _geom_angle_site_symmetry_1 
 _geom_angle_site_symmetry_3 
 _geom_angle_publ_flag 
N6 Cu1 N1 178.40(10) . . ? 
N3 Cu2 N2 178.58(10) . . ? 
N4 Cu3 N5 178.39(10) . . ? 
C1 N1 N2 107.4(2) . . ? 
C1 N1 Cu1 132.30(18) . . ? 
N2 N1 Cu1 120.26(16) . . ? 
C3 N2 N1 107.5(2) . . ? 
C3 N2 Cu2 132.23(18) . . ? 
N1 N2 Cu2 119.97(17) . . ? 
C6 N3 N4 107.7(2) . . ? 
C6 N3 Cu2 131.81(18) . . ? 
N4 N3 Cu2 120.50(16) . . ? 
C8 N4 N3 107.2(2) . . ? 
C8 N4 Cu3 133.40(18) . . ? 
N3 N4 Cu3 119.20(16) . . ? 
C11 N5 N6 107.4(2) . . ? 
C11 N5 Cu3 131.10(18) . . ? 
N6 N5 Cu3 120.96(17) . . ? 
C13 N6 N5 107.1(2) . . ? 
C13 N6 Cu1 133.19(18) . . ? 
N5 N6 Cu1 119.71(16) . . ? 
N1 C1 C2 110.5(2) . . ? 
N1 C1 C4 120.2(2) . . ? 
C2 C1 C4 129.3(2) . . ? 
C1 C2 C3 103.9(2) . . ? 
C1 C2 H2 128.1 . . ? 
C3 C2 H2 128.1 . . ? 
N2 C3 C2 110.7(2) . . ? 
N2 C3 C5 120.6(2) . . ? 
C2 C3 C5 128.7(2) . . ? 
F1 C4 F2 106.4(2) . . ? 
F1 C4 F3 107.1(2) . . ? 
F2 C4 F3 107.6(2) . . ? 
F1 C4 C1 112.5(2) . . ? 
F2 C4 C1 112.5(2) . . ? 
F3 C4 C1 110.4(2) . . ? 
F4 C5 F5 107.4(2) . . ? 
F4 C5 F6 108.0(2) . . ? 
F5 C5 F6 105.8(2) . . ? 
F4 C5 C3 111.0(2) . . ? 
F5 C5 C3 112.4(2) . . ? 
F6 C5 C3 111.9(2) . . ? 
N3 C6 C7 110.6(2) . . ? 
N3 C6 C9 120.0(2) . . ? 
C7 C6 C9 129.4(2) . . ? 
C8 C7 C6 103.6(2) . . ? 
C8 C7 H7 128.2 . . ? 
C6 C7 H7 128.2 . . ? 
N4 C8 C7 110.9(2) . . ? 
N4 C8 C10 120.6(2) . . ? 
C7 C8 C10 128.5(2) . . ? 
F9 C9 F8 107.9(2) . . ? 
F9 C9 F7 107.2(2) . . ? 
F8 C9 F7 106.4(2) . . ? 
F9 C9 C6 111.3(2) . . ? 
F8 C9 C6 112.3(2) . . ? 
F7 C9 C6 111.4(2) . . ? 
F11 C10 F12 107.6(2) . . ? 
F11 C10 F10 106.4(2) . . ? 
F12 C10 F10 107.4(2) . . ? 
F11 C10 C8 112.5(2) . . ? 
F12 C10 C8 110.6(2) . . ? 
F10 C10 C8 112.1(2) . . ? 
N5 C11 C12 111.1(2) . . ? 
N5 C11 C14 120.3(2) . . ? 
C12 C11 C14 128.6(2) . . ? 
C13 C12 C11 103.1(2) . . ? 
C13 C12 H12 128.5 . . ? 
C11 C12 H12 128.5 . . ? 
N6 C13 C12 111.4(2) . . ? 
N6 C13 C15 120.0(2) . . ? 
C12 C13 C15 128.6(2) . . ? 
F14 C14 F13 106.8(2) . . ? 
F14 C14 F15 107.7(2) . . ? 
F13 C14 F15 106.9(2) . . ? 
F14 C14 C11 112.6(2) . . ? 
F13 C14 C11 112.0(2) . . ? 
F15 C14 C11 110.6(2) . . ? 
F18 C15 F16 107.7(2) . . ? 
F18 C15 F17 107.2(2) . . ? 
F16 C15 F17 106.5(2) . . ? 
F18 C15 C13 110.7(2) . . ? 
F16 C15 C13 112.3(2) . . ? 
F17 C15 C13 112.2(2) . . ? 
  
_diffrn_measured_fraction_theta_max    0.990 
_diffrn_reflns_theta_full              26.00 
_diffrn_measured_fraction_theta_full   0.990 
_refine_diff_density_max    1.169 
_refine_diff_density_min   -1.104 
_refine_diff_density_rms    0.132 

#===END
  
data_03142 
  
_audit_creation_method            SHELXL-97 
_chemical_name_systematic 
; 
 ? 
; 
_chemical_name_common             [3,5-(i-Pr)2PzCu]3 
_chemical_melting_point           ? 
_chemical_formula_moiety          ? 
_chemical_formula_sum 
 'C27 H45 Cu3 N6' 
_chemical_formula_weight          644.31 
  
loop_ 
 _atom_type_symbol 
 _atom_type_description 
 _atom_type_scat_dispersion_real 
 _atom_type_scat_dispersion_imag 
 _atom_type_scat_source 
 'C'  'C'   0.0033   0.0016 
 'International Tables Vol C Tables 4.2.6.8 and 6.1.1.4' 
 'H'  'H'   0.0000   0.0000 
 'International Tables Vol C Tables 4.2.6.8 and 6.1.1.4' 
 'N'  'N'   0.0061   0.0033 
 'International Tables Vol C Tables 4.2.6.8 and 6.1.1.4' 
 'Cu'  'Cu'   0.3201   1.2651 
 'International Tables Vol C Tables 4.2.6.8 and 6.1.1.4' 
  
_symmetry_cell_setting            Monoclinic 
_symmetry_space_group_name_H-M    P2(1)/c 
  
loop_ 
 _symmetry_equiv_pos_as_xyz 
 'x, y, z' 
 '-x, y+1/2, -z+1/2' 
 '-x, -y, -z' 
 'x, -y-1/2, z-1/2' 
  
_cell_length_a                    14.3989(14) 
_cell_length_b                    13.4806(13) 
_cell_length_c                    17.2240(16) 
_cell_angle_alpha                 90.00 
_cell_angle_beta                  112.324(2) 
_cell_angle_gamma                 90.00 
_cell_volume                      3092.7(5) 
_cell_formula_units_Z             4 
_cell_measurement_temperature     100(2) 
_cell_measurement_reflns_used     ? 
_cell_measurement_theta_min       ? 
_cell_measurement_theta_max       ? 
  
_exptl_crystal_description        prism 
_exptl_crystal_colour             colorless 
_exptl_crystal_size_max           0.34 
_exptl_crystal_size_mid           0.32 
_exptl_crystal_size_min           0.20 
_exptl_crystal_density_meas       ? 
_exptl_crystal_density_diffrn     1.384 
_exptl_crystal_density_method     'not measured' 
_exptl_crystal_F_000              1344 
_exptl_absorpt_coefficient_mu     2.069 
_exptl_absorpt_correction_type    none 
_exptl_absorpt_correction_T_min   0.5397 
_exptl_absorpt_correction_T_max   0.6824 
_exptl_absorpt_process_details    SADABS 
  
_exptl_special_details 
; 
 ? 
; 
  
_diffrn_ambient_temperature       100(2) 
_diffrn_radiation_wavelength      0.71073 
_diffrn_radiation_type            MoK\a 
_diffrn_radiation_source          'fine-focus sealed tube' 
_diffrn_radiation_monochromator   graphite 
_diffrn_measurement_device_type   'Bruker P4' 
_diffrn_measurement_method        '\w scans' 
_diffrn_detector_area_resol_mean  ? 
_diffrn_standards_number          ? 
_diffrn_standards_interval_count  ? 
_diffrn_standards_interval_time   ? 
_diffrn_standards_decay_%         ? 
_diffrn_reflns_number             25331 
_diffrn_reflns_av_R_equivalents   0.0200 
_diffrn_reflns_av_sigmaI/netI     0.0238 
_diffrn_reflns_limit_h_min        -18 
_diffrn_reflns_limit_h_max        20 
_diffrn_reflns_limit_k_min        -18 
_diffrn_reflns_limit_k_max        18 
_diffrn_reflns_limit_l_min        -24 
_diffrn_reflns_limit_l_max        24 
_diffrn_reflns_theta_min          1.98 
_diffrn_reflns_theta_max          30.02 
_reflns_number_total              8995 
_reflns_number_gt                 8184 
_reflns_threshold_expression      >2sigma(I) 
  
_computing_data_collection        'Bruker XSCANS' 
_computing_cell_refinement        'Bruker XSCANS' 
_computing_data_reduction         'Bruker SHELXTL' 
_computing_structure_solution     'SHELXS-97 (Sheldrick, 1990)' 
_computing_structure_refinement   'SHELXL-97 (Sheldrick, 1997)' 
_computing_molecular_graphics     'Bruker SHELXTL' 
_computing_publication_material   'Bruker SHELXTL' 
  
_refine_special_details 
; 
 Refinement of F^2^ against ALL reflections.  The weighted R-factor wR and 
 goodness of fit S are based on F^2^, conventional R-factors R are based 
 on F, with F set to zero for negative F^2^. The threshold expression of 
 F^2^ > 2sigma(F^2^) is used only for calculating R-factors(gt) etc. and is 
 not relevant to the choice of reflections for refinement.  R-factors based 
 on F^2^ are statistically about twice as large as those based on F, and R- 
 factors based on ALL data will be even larger. 
; 
  
_refine_ls_structure_factor_coef  Fsqd 
_refine_ls_matrix_type            full 
_refine_ls_weighting_scheme       calc 
_refine_ls_weighting_details 
 'calc w=1/[\s^2^(Fo^2^)+(0.0379P)^2^+0.6787P] where P=(Fo^2^+2Fc^2^)/3' 
_atom_sites_solution_primary      direct 
_atom_sites_solution_secondary    difmap 
_atom_sites_solution_hydrogens    geom 
_refine_ls_hydrogen_treatment     mixed 
_refine_ls_extinction_method      none 
_refine_ls_extinction_coef        ? 
_refine_ls_number_reflns          8995 
_refine_ls_number_parameters      337 
_refine_ls_number_restraints      0 
_refine_ls_R_factor_all           0.0279 
_refine_ls_R_factor_gt            0.0248 
_refine_ls_wR_factor_ref          0.0672 
_refine_ls_wR_factor_gt           0.0657 
_refine_ls_goodness_of_fit_ref    1.078 
_refine_ls_restrained_S_all       1.078 
_refine_ls_shift/su_max           0.002 
_refine_ls_shift/su_mean          0.000 
  
loop_ 
 _atom_site_label 
 _atom_site_type_symbol 
 _atom_site_fract_x 
 _atom_site_fract_y 
 _atom_site_fract_z 
 _atom_site_U_iso_or_equiv 
 _atom_site_adp_type 
 _atom_site_occupancy 
 _atom_site_symmetry_multiplicity 
 _atom_site_calc_flag 
 _atom_site_refinement_flags 
 _atom_site_disorder_assembly 
 _atom_site_disorder_group 
Cu1 Cu -0.014110(11) 0.480185(11) 0.622084(8) 0.01459(4) Uani 1 1 d . . . 
Cu2 Cu 0.076003(10) 0.644479(11) 0.532863(8) 0.01455(4) Uani 1 1 d . . . 
Cu3 Cu 0.217686(11) 0.540010(11) 0.704597(9) 0.01526(4) Uani 1 1 d . . . 
N11 N -0.10074(7) 0.55947(8) 0.53663(6) 0.01493(18) Uani 1 1 d . . . 
N12 N -0.06218(8) 0.63045(8) 0.49926(6) 0.01472(18) Uani 1 1 d . . . 
N21 N 0.21203(8) 0.67575(8) 0.57922(6) 0.01601(19) Uani 1 1 d . . . 
N22 N 0.26819(8) 0.63913(8) 0.65796(6) 0.01729(19) Uani 1 1 d . . . 
N31 N 0.16826(8) 0.44514(8) 0.75630(6) 0.01568(18) Uani 1 1 d . . . 
N32 N 0.07004(8) 0.41542(8) 0.71856(6) 0.01551(18) Uani 1 1 d . . . 
C11 C -0.13915(9) 0.68579(9) 0.44833(7) 0.0152(2) Uani 1 1 d . . . 
C12 C -0.22832(9) 0.65010(9) 0.45173(7) 0.0176(2) Uani 1 1 d . . . 
H12A H -0.2942 0.6743 0.4216 0.021 Uiso 1 1 calc R . . 
C13 C -0.20082(9) 0.57154(9) 0.50855(7) 0.0160(2) Uani 1 1 d . . . 
C14 C -0.12026(10) 0.77162(9) 0.40019(7) 0.0195(2) Uani 1 1 d . . . 
H14A H -0.0724 0.7487 0.3744 0.023 Uiso 1 1 calc R . . 
C15 C -0.21578(13) 0.80463(13) 0.32988(10) 0.0385(4) Uani 1 1 d . . . 
H15A H -0.2473 0.7476 0.2944 0.058 Uiso 1 1 calc R . . 
H15B H -0.1998 0.8552 0.2960 0.058 Uiso 1 1 calc R . . 
H15C H -0.2621 0.8324 0.3537 0.058 Uiso 1 1 calc R . . 
C16 C -0.07209(14) 0.85875(11) 0.45759(9) 0.0345(3) Uani 1 1 d . . . 
H16A H -0.0085 0.8375 0.5010 0.052 Uiso 1 1 calc R . . 
H16B H -0.1173 0.8823 0.4841 0.052 Uiso 1 1 calc R . . 
H16C H -0.0595 0.9125 0.4246 0.052 Uiso 1 1 calc R . . 
C17 C -0.26294(10) 0.50821(10) 0.54202(8) 0.0197(2) Uani 1 1 d . . . 
H17A H -0.2322 0.4405 0.5527 0.024 Uiso 1 1 calc R . . 
C18 C -0.37036(11) 0.49746(13) 0.47929(10) 0.0318(3) Uani 1 1 d . . . 
H18A H -0.3702 0.4689 0.4270 0.048 Uiso 1 1 calc R . . 
H18B H -0.4025 0.5628 0.4678 0.048 Uiso 1 1 calc R . . 
H18C H -0.4076 0.4537 0.5026 0.048 Uiso 1 1 calc R . . 
C19 C -0.26007(13) 0.54911(12) 0.62605(9) 0.0317(3) Uani 1 1 d . . . 
H19A H -0.1904 0.5513 0.6664 0.048 Uiso 1 1 calc R . . 
H19B H -0.2995 0.5060 0.6477 0.048 Uiso 1 1 calc R . . 
H19C H -0.2885 0.6162 0.6177 0.048 Uiso 1 1 calc R . . 
C21 C 0.35678(10) 0.68676(11) 0.68683(8) 0.0229(3) Uani 1 1 d . . . 
C22 C 0.35907(11) 0.75455(12) 0.62649(8) 0.0285(3) Uani 1 1 d . . . 
H22A H 0.4125 0.7978 0.6298 0.034 Uiso 1 1 calc R . . 
C23 C 0.26654(10) 0.74547(10) 0.56033(8) 0.0204(2) Uani 1 1 d . . . 
C24 C 0.43591(11) 0.66260(12) 0.77119(9) 0.0298(3) Uani 1 1 d . . . 
H24A H 0.4026 0.6274 0.8047 0.036 Uiso 1 1 calc R . . 
C25 C 0.51541(12) 0.59296(15) 0.76220(11) 0.0415(4) Uani 1 1 d . . . 
H25A H 0.4829 0.5326 0.7326 0.062 Uiso 1 1 calc R . . 
H25B H 0.5642 0.5754 0.8180 0.062 Uiso 1 1 calc R . . 
H25C H 0.5500 0.6263 0.7303 0.062 Uiso 1 1 calc R . . 
C26 C 0.48369(14) 0.75685(14) 0.81819(9) 0.0414(4) Uani 1 1 d . . . 
H26A H 0.4316 0.7992 0.8243 0.062 Uiso 1 1 calc R . . 
H26B H 0.5173 0.7925 0.7867 0.062 Uiso 1 1 calc R . . 
H26C H 0.5329 0.7395 0.8739 0.062 Uiso 1 1 calc R . . 
C27 C 0.22615(10) 0.80163(11) 0.47906(8) 0.0237(3) Uani 1 1 d . . . 
H27A H 0.1596 0.7723 0.4438 0.028 Uiso 1 1 calc R . . 
C28 C 0.20974(13) 0.91064(12) 0.49459(10) 0.0345(3) Uani 1 1 d . . . 
H28A H 0.1648 0.9153 0.5252 0.052 Uiso 1 1 calc R . . 
H28B H 0.1796 0.9452 0.4407 0.052 Uiso 1 1 calc R . . 
H28C H 0.2744 0.9414 0.5278 0.052 Uiso 1 1 calc R . . 
C29 C 0.29613(12) 0.79121(12) 0.43099(9) 0.0303(3) Uani 1 1 d . . . 
H29A H 0.3031 0.7209 0.4197 0.046 Uiso 1 1 calc R . . 
H29B H 0.3622 0.8186 0.4648 0.046 Uiso 1 1 calc R . . 
H29C H 0.2678 0.8274 0.3778 0.046 Uiso 1 1 calc R . . 
C31 C 0.05207(9) 0.34647(9) 0.76766(7) 0.0170(2) Uani 1 1 d . . . 
C32 C 0.13987(9) 0.33050(9) 0.83810(7) 0.0184(2) Uani 1 1 d . . . 
H32A H 0.1491 0.2856 0.8830 0.022 Uiso 1 1 calc R . . 
C33 C 0.21082(9) 0.39406(9) 0.82872(7) 0.0164(2) Uani 1 1 d . . . 
C34 C -0.04953(10) 0.29965(10) 0.74226(8) 0.0225(2) Uani 1 1 d . . . 
H34A H -0.0890 0.3179 0.6825 0.027 Uiso 1 1 calc R . . 
C35 C -0.10676(12) 0.33788(14) 0.79509(10) 0.0349(3) Uani 1 1 d . . . 
H35A H -0.1121 0.4103 0.7906 0.052 Uiso 1 1 calc R . . 
H35B H -0.0706 0.3191 0.8539 0.052 Uiso 1 1 calc R . . 
H35C H -0.1742 0.3087 0.7745 0.052 Uiso 1 1 calc R . . 
C36 C -0.03986(12) 0.18631(11) 0.74716(10) 0.0326(3) Uani 1 1 d . . . 
H36A H -0.0071 0.1635 0.7098 0.049 Uiso 1 1 calc R . . 
H36B H -0.1068 0.1565 0.7298 0.049 Uiso 1 1 calc R . . 
H36C H 0.0005 0.1665 0.8050 0.049 Uiso 1 1 calc R . . 
C37 C 0.31888(9) 0.41260(10) 0.88409(8) 0.0195(2) Uani 1 1 d . . . 
H37A H 0.3271 0.4857 0.8944 0.023 Uiso 1 1 calc R . . 
C38 C 0.34772(11) 0.36167(11) 0.96929(8) 0.0277(3) Uani 1 1 d . . . 
H38A H 0.3012 0.3822 0.9956 0.042 Uiso 1 1 calc R . . 
H38B H 0.4163 0.3806 1.0054 0.042 Uiso 1 1 calc R . . 
H38C H 0.3441 0.2896 0.9615 0.042 Uiso 1 1 calc R . . 
C39 C 0.39088(11) 0.38115(12) 0.84221(9) 0.0295(3) Uani 1 1 d . . . 
H39A H 0.3695 0.4110 0.7862 0.044 Uiso 1 1 calc R . . 
H39B H 0.3903 0.3087 0.8372 0.044 Uiso 1 1 calc R . . 
H39C H 0.4590 0.4036 0.8764 0.044 Uiso 1 1 calc R . . 
  
loop_ 
 _atom_site_aniso_label 
 _atom_site_aniso_U_11 
 _atom_site_aniso_U_22 
 _atom_site_aniso_U_33 
 _atom_site_aniso_U_23 
 _atom_site_aniso_U_13 
 _atom_site_aniso_U_12 
Cu1 0.01443(7) 0.01435(8) 0.01450(7) 0.00281(5) 0.00492(5) 0.00058(5) 
Cu2 0.01182(7) 0.01563(8) 0.01605(7) 0.00119(5) 0.00515(5) -0.00068(5) 
Cu3 0.01393(7) 0.01568(8) 0.01700(7) 0.00296(5) 0.00681(5) -0.00054(5) 
N11 0.0141(4) 0.0150(5) 0.0160(4) 0.0015(3) 0.0060(4) 0.0000(4) 
N12 0.0140(4) 0.0150(4) 0.0152(4) 0.0023(3) 0.0056(3) 0.0004(4) 
N21 0.0146(4) 0.0172(5) 0.0161(4) 0.0015(4) 0.0056(4) -0.0012(4) 
N22 0.0144(5) 0.0201(5) 0.0168(4) 0.0024(4) 0.0053(4) -0.0021(4) 
N31 0.0144(4) 0.0154(5) 0.0178(4) 0.0026(4) 0.0067(4) 0.0008(4) 
N32 0.0156(4) 0.0153(5) 0.0158(4) 0.0019(3) 0.0061(4) -0.0007(4) 
C11 0.0166(5) 0.0156(5) 0.0131(4) 0.0002(4) 0.0052(4) 0.0021(4) 
C12 0.0142(5) 0.0204(6) 0.0176(5) 0.0000(4) 0.0054(4) 0.0030(4) 
C13 0.0142(5) 0.0179(5) 0.0164(5) -0.0018(4) 0.0064(4) -0.0003(4) 
C14 0.0237(6) 0.0182(6) 0.0185(5) 0.0038(4) 0.0103(5) 0.0037(5) 
C15 0.0390(9) 0.0350(8) 0.0267(7) 0.0152(6) -0.0041(6) -0.0030(7) 
C16 0.0459(9) 0.0235(7) 0.0278(7) 0.0050(5) 0.0070(6) -0.0082(6) 
C17 0.0178(6) 0.0206(6) 0.0239(5) 0.0002(5) 0.0114(5) -0.0014(5) 
C18 0.0176(6) 0.0413(9) 0.0371(7) -0.0006(7) 0.0111(6) -0.0063(6) 
C19 0.0394(8) 0.0350(8) 0.0298(7) -0.0023(6) 0.0233(6) -0.0067(7) 
C21 0.0175(6) 0.0286(7) 0.0199(5) 0.0042(5) 0.0042(4) -0.0071(5) 
C22 0.0207(6) 0.0362(8) 0.0239(6) 0.0078(5) 0.0031(5) -0.0137(6) 
C23 0.0184(6) 0.0220(6) 0.0197(5) 0.0031(4) 0.0062(5) -0.0045(5) 
C24 0.0203(6) 0.0414(8) 0.0217(6) 0.0094(6) 0.0012(5) -0.0103(6) 
C25 0.0219(7) 0.0571(11) 0.0364(8) 0.0142(8) 0.0008(6) 0.0000(7) 
C26 0.0377(9) 0.0530(11) 0.0222(6) 0.0054(6) -0.0012(6) -0.0215(8) 
C27 0.0220(6) 0.0266(7) 0.0208(5) 0.0065(5) 0.0063(5) -0.0064(5) 
C28 0.0415(9) 0.0269(8) 0.0356(7) 0.0088(6) 0.0153(7) 0.0000(6) 
C29 0.0329(7) 0.0354(8) 0.0250(6) 0.0064(6) 0.0136(6) -0.0059(6) 
C31 0.0191(6) 0.0163(5) 0.0161(5) 0.0024(4) 0.0074(4) -0.0014(4) 
C32 0.0201(6) 0.0180(6) 0.0170(5) 0.0045(4) 0.0069(4) 0.0005(4) 
C33 0.0179(5) 0.0160(5) 0.0160(5) 0.0016(4) 0.0070(4) 0.0028(4) 
C34 0.0199(6) 0.0264(7) 0.0190(5) 0.0072(5) 0.0049(4) -0.0055(5) 
C35 0.0241(7) 0.0474(10) 0.0364(8) 0.0040(7) 0.0152(6) -0.0053(7) 
C36 0.0326(8) 0.0254(7) 0.0353(7) 0.0078(6) 0.0077(6) -0.0099(6) 
C37 0.0163(5) 0.0201(6) 0.0208(5) 0.0026(4) 0.0056(4) 0.0034(4) 
C38 0.0255(7) 0.0292(7) 0.0217(6) 0.0055(5) 0.0012(5) 0.0011(5) 
C39 0.0185(6) 0.0378(8) 0.0321(7) -0.0005(6) 0.0092(5) 0.0062(6) 
  
_geom_special_details 
; 
 All esds (except the esd in the dihedral angle between two l.s. planes) 
 are estimated using the full covariance matrix.  The cell esds are taken 
 into account individually in the estimation of esds in distances, angles 
 and torsion angles; correlations between esds in cell parameters are only 
 used when they are defined by crystal symmetry.  An approximate (isotropic) 
 treatment of cell esds is used for estimating esds involving l.s. planes. 
; 
  
loop_ 
 _geom_bond_atom_site_label_1 
 _geom_bond_atom_site_label_2 
 _geom_bond_distance 
 _geom_bond_site_symmetry_2 
 _geom_bond_publ_flag 
Cu1 N32 1.8606(10) . ? 
Cu1 N11 1.8628(10) . ? 
Cu1 Cu2 2.9889(3) 3_566 ? 
Cu2 N12 1.8587(10) . ? 
Cu2 N21 1.8610(10) . ? 
Cu2 Cu1 2.9890(3) 3_566 ? 
Cu3 N22 1.8448(10) . ? 
Cu3 N31 1.8484(10) . ? 
N11 C13 1.3445(15) . ? 
N11 N12 1.3818(13) . ? 
N12 C11 1.3475(15) . ? 
N21 C23 1.3414(16) . ? 
N21 N22 1.3798(14) . ? 
N22 C21 1.3435(16) . ? 
N31 C33 1.3509(15) . ? 
N31 N32 1.3728(14) . ? 
N32 C31 1.3463(15) . ? 
C11 C12 1.3931(17) . ? 
C11 C14 1.5072(16) . ? 
C12 C13 1.3934(17) . ? 
C12 H12A 0.9500 . ? 
C13 C17 1.5010(16) . ? 
C14 C15 1.5136(19) . ? 
C14 C16 1.522(2) . ? 
C14 H14A 1.0000 . ? 
C15 H15A 0.9800 . ? 
C15 H15B 0.9800 . ? 
C15 H15C 0.9800 . ? 
C16 H16A 0.9800 . ? 
C16 H16B 0.9800 . ? 
C16 H16C 0.9800 . ? 
C17 C18 1.5203(19) . ? 
C17 C19 1.5346(18) . ? 
C17 H17A 1.0000 . ? 
C18 H18A 0.9800 . ? 
C18 H18B 0.9800 . ? 
C18 H18C 0.9800 . ? 
C19 H19A 0.9800 . ? 
C19 H19B 0.9800 . ? 
C19 H19C 0.9800 . ? 
C21 C22 1.3937(18) . ? 
C21 C24 1.5027(18) . ? 
C22 C23 1.3911(18) . ? 
C22 H22A 0.9500 . ? 
C23 C27 1.5008(17) . ? 
C24 C26 1.523(2) . ? 
C24 C25 1.533(3) . ? 
C24 H24A 1.0000 . ? 
C25 H25A 0.9800 . ? 
C25 H25B 0.9800 . ? 
C25 H25C 0.9800 . ? 
C26 H26A 0.9800 . ? 
C26 H26B 0.9800 . ? 
C26 H26C 0.9800 . ? 
C27 C28 1.528(2) . ? 
C27 C29 1.5343(19) . ? 
C27 H27A 1.0000 . ? 
C28 H28A 0.9800 . ? 
C28 H28B 0.9800 . ? 
C28 H28C 0.9800 . ? 
C29 H29A 0.9800 . ? 
C29 H29B 0.9800 . ? 
C29 H29C 0.9800 . ? 
C31 C32 1.3970(17) . ? 
C31 C34 1.4979(17) . ? 
C32 C33 1.3891(17) . ? 
C32 H32A 0.9500 . ? 
C33 C37 1.5052(17) . ? 
C34 C35 1.530(2) . ? 
C34 C36 1.534(2) . ? 
C34 H34A 1.0000 . ? 
C35 H35A 0.9800 . ? 
C35 H35B 0.9800 . ? 
C35 H35C 0.9800 . ? 
C36 H36A 0.9800 . ? 
C36 H36B 0.9800 . ? 
C36 H36C 0.9800 . ? 
C37 C38 1.5279(18) . ? 
C37 C39 1.5307(18) . ? 
C37 H37A 1.0000 . ? 
C38 H38A 0.9800 . ? 
C38 H38B 0.9800 . ? 
C38 H38C 0.9800 . ? 
C39 H39A 0.9800 . ? 
C39 H39B 0.9800 . ? 
C39 H39C 0.9800 . ? 
  
loop_ 
 _geom_angle_atom_site_label_1 
 _geom_angle_atom_site_label_2 
 _geom_angle_atom_site_label_3 
 _geom_angle 
 _geom_angle_site_symmetry_1 
 _geom_angle_site_symmetry_3 
 _geom_angle_publ_flag 
N32 Cu1 N11 171.25(4) . . ? 
N32 Cu1 Cu2 113.94(3) . 3_566 ? 
N11 Cu1 Cu2 74.58(3) . 3_566 ? 
N12 Cu2 N21 169.84(4) . . ? 
N12 Cu2 Cu1 75.16(3) . 3_566 ? 
N21 Cu2 Cu1 114.76(3) . 3_566 ? 
N22 Cu3 N31 176.89(5) . . ? 
C13 N11 N12 108.31(10) . . ? 
C13 N11 Cu1 131.16(8) . . ? 
N12 N11 Cu1 119.89(8) . . ? 
C11 N12 N11 108.06(9) . . ? 
C11 N12 Cu2 131.67(8) . . ? 
N11 N12 Cu2 119.83(8) . . ? 
C23 N21 N22 108.10(10) . . ? 
C23 N21 Cu2 132.23(9) . . ? 
N22 N21 Cu2 117.97(7) . . ? 
C21 N22 N21 108.20(10) . . ? 
C21 N22 Cu3 131.37(9) . . ? 
N21 N22 Cu3 120.42(8) . . ? 
C33 N31 N32 108.24(9) . . ? 
C33 N31 Cu3 132.44(9) . . ? 
N32 N31 Cu3 119.32(8) . . ? 
C31 N32 N31 108.25(10) . . ? 
C31 N32 Cu1 132.04(9) . . ? 
N31 N32 Cu1 119.36(7) . . ? 
N12 C11 C12 108.94(10) . . ? 
N12 C11 C14 120.50(11) . . ? 
C12 C11 C14 130.55(11) . . ? 
C11 C12 C13 105.75(10) . . ? 
C11 C12 H12A 127.1 . . ? 
C13 C12 H12A 127.1 . . ? 
N11 C13 C12 108.93(10) . . ? 
N11 C13 C17 120.44(11) . . ? 
C12 C13 C17 130.56(11) . . ? 
C11 C14 C15 111.52(12) . . ? 
C11 C14 C16 111.59(10) . . ? 
C15 C14 C16 110.14(12) . . ? 
C11 C14 H14A 107.8 . . ? 
C15 C14 H14A 107.8 . . ? 
C16 C14 H14A 107.8 . . ? 
C14 C15 H15A 109.5 . . ? 
C14 C15 H15B 109.5 . . ? 
H15A C15 H15B 109.5 . . ? 
C14 C15 H15C 109.5 . . ? 
H15A C15 H15C 109.5 . . ? 
H15B C15 H15C 109.5 . . ? 
C14 C16 H16A 109.5 . . ? 
C14 C16 H16B 109.5 . . ? 
H16A C16 H16B 109.5 . . ? 
C14 C16 H16C 109.5 . . ? 
H16A C16 H16C 109.5 . . ? 
H16B C16 H16C 109.5 . . ? 
C13 C17 C18 112.02(11) . . ? 
C13 C17 C19 110.57(11) . . ? 
C18 C17 C19 111.11(12) . . ? 
C13 C17 H17A 107.6 . . ? 
C18 C17 H17A 107.6 . . ? 
C19 C17 H17A 107.6 . . ? 
C17 C18 H18A 109.5 . . ? 
C17 C18 H18B 109.5 . . ? 
H18A C18 H18B 109.5 . . ? 
C17 C18 H18C 109.5 . . ? 
H18A C18 H18C 109.5 . . ? 
H18B C18 H18C 109.5 . . ? 
C17 C19 H19A 109.5 . . ? 
C17 C19 H19B 109.5 . . ? 
H19A C19 H19B 109.5 . . ? 
C17 C19 H19C 109.5 . . ? 
H19A C19 H19C 109.5 . . ? 
H19B C19 H19C 109.5 . . ? 
N22 C21 C22 108.99(11) . . ? 
N22 C21 C24 121.26(11) . . ? 
C22 C21 C24 129.73(12) . . ? 
C23 C22 C21 105.46(11) . . ? 
C23 C22 H22A 127.3 . . ? 
C21 C22 H22A 127.3 . . ? 
N21 C23 C22 109.24(11) . . ? 
N21 C23 C27 121.64(11) . . ? 
C22 C23 C27 129.12(12) . . ? 
C21 C24 C26 110.90(13) . . ? 
C21 C24 C25 110.86(13) . . ? 
C26 C24 C25 111.14(14) . . ? 
C21 C24 H24A 107.9 . . ? 
C26 C24 H24A 107.9 . . ? 
C25 C24 H24A 107.9 . . ? 
C24 C25 H25A 109.5 . . ? 
C24 C25 H25B 109.5 . . ? 
H25A C25 H25B 109.5 . . ? 
C24 C25 H25C 109.5 . . ? 
H25A C25 H25C 109.5 . . ? 
H25B C25 H25C 109.5 . . ? 
C24 C26 H26A 109.5 . . ? 
C24 C26 H26B 109.5 . . ? 
H26A C26 H26B 109.5 . . ? 
C24 C26 H26C 109.5 . . ? 
H26A C26 H26C 109.5 . . ? 
H26B C26 H26C 109.5 . . ? 
C23 C27 C28 110.65(12) . . ? 
C23 C27 C29 110.85(12) . . ? 
C28 C27 C29 111.06(12) . . ? 
C23 C27 H27A 108.0 . . ? 
C28 C27 H27A 108.0 . . ? 
C29 C27 H27A 108.0 . . ? 
C27 C28 H28A 109.5 . . ? 
C27 C28 H28B 109.5 . . ? 
H28A C28 H28B 109.5 . . ? 
C27 C28 H28C 109.5 . . ? 
H28A C28 H28C 109.5 . . ? 
H28B C28 H28C 109.5 . . ? 
C27 C29 H29A 109.5 . . ? 
C27 C29 H29B 109.5 . . ? 
H29A C29 H29B 109.5 . . ? 
C27 C29 H29C 109.5 . . ? 
H29A C29 H29C 109.5 . . ? 
H29B C29 H29C 109.5 . . ? 
N32 C31 C32 109.00(11) . . ? 
N32 C31 C34 120.46(11) . . ? 
C32 C31 C34 130.54(11) . . ? 
C33 C32 C31 105.47(10) . . ? 
C33 C32 H32A 127.3 . . ? 
C31 C32 H32A 127.3 . . ? 
N31 C33 C32 109.03(11) . . ? 
N31 C33 C37 119.84(11) . . ? 
C32 C33 C37 131.12(11) . . ? 
C31 C34 C35 111.79(12) . . ? 
C31 C34 C36 110.21(12) . . ? 
C35 C34 C36 111.16(12) . . ? 
C31 C34 H34A 107.8 . . ? 
C35 C34 H34A 107.8 . . ? 
C36 C34 H34A 107.8 . . ? 
C34 C35 H35A 109.5 . . ? 
C34 C35 H35B 109.5 . . ? 
H35A C35 H35B 109.5 . . ? 
C34 C35 H35C 109.5 . . ? 
H35A C35 H35C 109.5 . . ? 
H35B C35 H35C 109.5 . . ? 
C34 C36 H36A 109.5 . . ? 
C34 C36 H36B 109.5 . . ? 
H36A C36 H36B 109.5 . . ? 
C34 C36 H36C 109.5 . . ? 
H36A C36 H36C 109.5 . . ? 
H36B C36 H36C 109.5 . . ? 
C33 C37 C38 111.86(11) . . ? 
C33 C37 C39 112.18(11) . . ? 
C38 C37 C39 110.03(11) . . ? 
C33 C37 H37A 107.5 . . ? 
C38 C37 H37A 107.5 . . ? 
C39 C37 H37A 107.5 . . ? 
C37 C38 H38A 109.5 . . ? 
C37 C38 H38B 109.5 . . ? 
H38A C38 H38B 109.5 . . ? 
C37 C38 H38C 109.5 . . ? 
H38A C38 H38C 109.5 . . ? 
H38B C38 H38C 109.5 . . ? 
C37 C39 H39A 109.5 . . ? 
C37 C39 H39B 109.5 . . ? 
H39A C39 H39B 109.5 . . ? 
C37 C39 H39C 109.5 . . ? 
H39A C39 H39C 109.5 . . ? 
H39B C39 H39C 109.5 . . ? 
  
_diffrn_measured_fraction_theta_max    0.996 
_diffrn_reflns_theta_full              30.02 
_diffrn_measured_fraction_theta_full   0.996 
_refine_diff_density_max    0.708 
_refine_diff_density_min   -0.293 
_refine_diff_density_rms    0.076 

#===END
